# Supplementary material for: On the formation of highly oxidized pollutants by autoxidation of terpenes under low-temperature-combustion conditions: the case of limonene and α -pinene
Source: Copernicus journal article supplement (doi:10.5194/acp-23-5715-2023), 2023-05-23
Supplement: Supplementary file 1 [file acp-23-5715-2023-supplement.zip]

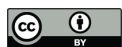

*Supplement of*

**On the formation of highly oxidized pollutants by autoxidation of terpenes under low-temperature-combustion conditions: the case of limonene and  $\alpha$ -pinene**

**Roland Benoit et al.**

*Correspondence to:* Roland Benoit ([roland.benoit@cnrs-orleans.fr](mailto:roland.benoit@cnrs-orleans.fr))

- [acp-23-5715-2023-supplement-title-page.pdf](#)
- [ARTSUPPLEMENT Vedit.pdf](#)
- [Data supplements acp-2022-635.xlsx](#)

The copyright of individual parts of the supplement might differ from the article licence.
