# Supplementary material for: On the formation of highly oxidized pollutants by autoxidation of terpenes under low-temperature-combustion conditions: the case of limonene and α -pinene
Source: Copernicus journal article supplement (doi:10.5194/acp-23-5715-2023), 2023-05-23
Supplement: Supplementary file 1 [file Data supplements acp-2022-635.xlsx]

## Sheet: introduction
Description of the content
Tab 'Limo data HESI Neg &Pos': in this tab one can find ions detected in the mass range 50-750 m/z
Tab 'Common st limonene+ 4 studies': in this tab one can find the 78 chemical formulas identified in the four studies cited in the article and combustion experiments
JSR-FIA-HRMS data
Classification of the 78 chemical formulas by difference of 2 oxygens
Tab 'A-pinene data HESI Neg &Pos': in this tab one can find ions detected in the mass range 50-750 m/z

## Sheet: 2) Limo data HESI Neg & Pos
Mass	Ions (Neg mode)	Signal		Mass	Ions (Pos mode)	Signal
55.0189	C3H3O	95742.9		53.0387	C4H5	22781.6
57.0346	C3H5O	774948		55.0179	C3H3O	31806.4
59.0139	C2H3O2	12529200		55.0543	C4H7	112904
60.9931	CHO3	33027500		57.0335	C3H5O	143061
65.0397	C5H5	13860.7		57.0699	C4H9	204034
67.0189	C4H3O	76016.8		59.0491	C3H7O	16483300
68.9982	C3HO2	389861		61.0283	C2H5O2	312562
69.0346	C4H5O	1228460		67.0541	C5H7	2536460
71.0138	C3H3O2	3375460		69.0333	C4H5O	1007430
71.0502	C4H7O	437445		69.0697	C5H9	1234940
72.9931	C2HO3	6881980		71.0126	C3H3O2	1622100
73.0295	C3H5O2	2269600		71.049	C4H7O	5231070
75.0087	C2H3O3	4081370		73.0646	C4H9O	178823
76.988	CHO4	9707670		75.0439	C3H7O2	2078150
79.0553	C6H7	48946.8		79.054	C6H7	3223400
81.0346	C5H5O	556136		81.0333	C5H5O	123582
83.0139	C4H3O2	768830		81.0697	C6H9	31633100
83.0503	C5H7O	1047860		83.0489	C5H7O	4136550
84.9931	C3HO3	29504.7		83.0853	C6H11	5577800
85.0295	C4H5O2	5812000		85.0282	C4H5O2	1511710
85.0659	C5H9O	83866.6		85.0646	C5H9O	3157060
87.0088	C3H3O3	9356000		87.0439	C4H7O2	4636080
87.0452	C4H7O2	1368580		87.0802	C5H11O	190375
88.9881	C2HO4	326376		89.0594	C4H9O2	2474680
89.0245	C3H5O3	1450370		91.0387	C3H7O3	28214.2
91.0037	C2H3O4	38033.8		91.054	C7H7	9663560
93.0346	C6H5O	336060		93.0697	C7H9	112305000
95.0139	C5H3O2	437070		95.0489	C6H7O	14458100
95.0503	C6H7O	1076520		95.0853	C7H11	75545300
96.9931	C4HO3	57113.8		97.0282	C5H5O2	808393
97.0295	C5H5O2	2258290		97.0645	C6H9O	34323800
97.0659	C6H9O	755082		97.1009	C7H13	257225
99.0088	C4H3O3	2721270		99.0438	C5H7O2	5785900
99.0452	C5H7O2	2197300		99.0802	C6H11O	3189720
99.0816	C6H11O	32745.2		101.059	C5H9O2	3262760
100.988	C3HO4	130280		103.039	C4H7O3	645397
101.024	C4H5O3	3118390		105.054	C4H9O3	353206
101.061	C5H9O2	1294510		105.07	C8H9	9332450
103.004	C3H3O4	776124		107.049	C7H7O	3683410
103.04	C4H7O3	1298810		107.085	C8H11	234443000
105.019	C3H5O4	30078.4		109.065	C7H9O	55284800
105.071	C8H9	9647.23		109.101	C8H13	31715200
107.014	C6H3O2	12967.8		111.044	C6H7O2	10940000
107.05	C7H7O	1025450		111.08	C7H11O	67490000
109.029	C6H5O2	2463840		111.117	C8H15	151918
109.066	C7H9O	869509		113.059	C6H9O2	11840600
111.009	C5H3O3	2296690		113.096	C7H13O	1373850
111.045	C6H7O2	6107080		115.039	C5H7O3	587395
111.082	C7H11O	571669		115.054	C9H7	507635
112.988	C4HO4	799375		115.075	C6H11O2	6361040
113.024	C5H5O3	11362900		117.054	C5H9O3	386427
113.061	C6H9O2	2740750		117.07	C9H9	2342290
113.097	C7H13O	42861.3		117.091	C6H13O2	15359.7
115.004	C4H3O4	2024660		119.049	C8H7O	19107.1
115.04	C5H7O3	8573410		119.07	C5H11O3	9288.55
115.076	C6H11O2	470768		119.085	C9H11	19954000
116.983	C3HO5	35307.8		121.049	C4H9O4	276762
117.019	C4H5O4	2718960		121.064	C8H9O	4021890
117.056	C5H9O3	565060		121.101	C9H13	110636000
118.999	C3H3O5	120276		123.044	C7H7O2	4944240
119.035	C4H7O4	211772		123.08	C8H11O	74008100
119.05	C8H7O	170543		123.116	C9H15	111021000
119.087	C9H11	50746.7		125.059	C7H9O2	46423400
121.03	C7H5O2	5054460		125.096	C8H13O	51713900
121.066	C8H9O	761989		125.132	C9H17	238786
123.009	C6H3O3	1853850		127.039	C6H7O3	2078080
123.045	C7H7O2	6357570		127.075	C7H11O2	129807000
123.082	C8H11O	1158940		129.127	C8H17O	28855.4
124.988	C5HO4	75104.3		131.07	C6H11O3	713679
125.024	C6H5O3	6483750		131.085	C10H11	14731500
125.061	C7H9O2	4836150		133.049	C5H9O4	32495.8
125.097	C8H13O	353180		133.064	C9H9O	1487160
127.004	C5H3O4	2331840		133.101	C10H13	103423000
127.04	C6H7O3	9409270		135.08	C9H11O	38853900
127.076	C7H11O2	988127		135.101	C6H15O3	24454.7
127.113	C8H15O	165648		137.059	C8H9O2	8178730
128.983	C4HO5	28380.5		137.096	C9H13O	336803000
129.019	C5H5O4	3562140		137.132	C10H17	63243700
129.056	C6H9O3	4263190		139.039	C7H7O3	3293470
129.092	C7H13O2	342341		139.075	C8H11O2	45674000
130.999	C4H3O5	186211		139.111	C9H15O	47079100
131.035	C5H7O4	1839420		143.07	C7H11O3	21889000
131.071	C6H11O3	247648		143.085	C11H11	13229.1
131.087	C10H11	18716.6		143.106	C8H15O2	10509200
133.014	C4H5O5	144343		143.143	C9H19O	12458.4
133.051	C5H9O4	98877.9		145.049	C6H9O4	129784
133.066	C9H9O	362657		145.064	C10H9O	106969
133.102	C10H13	14404.9		145.086	C7H13O3	3485960
135.009	C7H3O3	13811.4		145.101	C11H13	504068
135.045	C8H7O2	1936330		145.122	C8H17O2	114023
135.082	C9H11O	796324		147.044	C9H7O2	14752.7
137.024	C7H5O3	5163350		147.065	C6H11O4	25570.2
137.061	C8H9O2	2900390		147.08	C10H11O	14430100
137.097	C9H13O	486102		147.101	C7H15O3	21648.2
139.004	C6H3O4	1866760		147.116	C11H15	804119
139.04	C7H7O3	9886200		147.138	C8H19O2	296120
139.076	C8H11O2	2888170		149.023	C8H5O3	484956
139.113	C9H15O	324326		149.059	C9H9O2	1623460
140.983	C5HO5	223981		149.096	C10H13O	209425000
141.019	C6H5O4	5366990		149.132	C11H17	1227600
141.056	C7H9O3	7029250		151.039	C8H7O3	37166
141.092	C8H13O2	528192		151.075	C9H11O2	137272000
141.129	C9H17O	167039		151.111	C10H15O	582607000
142.999	C5H3O5	278985		151.148	C11H19	262968
143.035	C6H7O4	5043930		153.054	C8H9O3	11407000
143.071	C7H11O3	1954750		153.091	C9H13O2	943058000
143.108	C8H15O2	578120		153.127	C10H17O	192149000
145.014	C5H5O5	514086		155.033	C7H7O4	219216
145.051	C6H9O4	2295640		155.055	C4H11O6	836202
145.087	C7H13O3	195017		155.07	C8H11O3	17777800
147.009	C8H3O3	13805.6		155.085	C12H11	99428.1
147.03	C5H7O5	252181		155.106	C9H15O2	350722000
147.045	C9H7O2	144904		155.143	C10H19O	817826
147.066	C6H11O4	38960.9		157.049	C7H9O4	410650
147.082	C10H11O	222147		157.086	C8H13O3	19546100
149.01	C4H5O6	18784.7		157.101	C12H13	722593
149.024	C8H5O3	369242		157.122	C9H17O2	1364480
149.046	C5H9O5	10343.9		159.065	C7H11O4	4396880
149.061	C9H9O2	3172680		159.08	C11H11O	409043
149.097	C10H13O	301825		159.101	C8H15O3	2510030
151.004	C7H3O4	236028		159.117	C12H15	2170660
151.04	C8H7O3	2601950		161.059	C10H9O2	399062
151.076	C9H11O2	3670720		161.08	C7H13O4	90906
151.113	C10H15O	313400		161.096	C11H13O	3512660
152.983	C6HO5	25755		161.117	C8H17O3	1919770
153.019	C7H5O4	3793780		161.132	C12H17	1087580
153.056	C8H9O3	6798070		163.039	C9H7O3	11259
153.092	C9H13O2	1818040		163.075	C10H11O2	9615130
154.999	C6H3O5	712489		163.111	C11H15O	2206260
155.02	C3H7O7	19878.1		163.133	C8H19O3	52461.8
155.035	C7H7O4	9440410		163.148	C12H19	791384
155.071	C8H11O3	5005920		165.054	C9H9O3	1318510
155.087	C12H11	9840.6		165.091	C10H13O2	217827000
155.108	C9H15O2	270446		165.127	C11H17O	3736410
156.978	C5HO6	11489		165.164	C12H21	9068.51
157.014	C6H5O5	1003960		167.034	C8H7O4	10260.8
157.051	C7H9O4	9054010		167.049	C12H7O	598867
157.087	C8H13O3	1224200		167.07	C9H11O3	18268300
157.123	C9H17O2	1763120		167.106	C10H15O2	841600000
158.994	C5H3O6	83192.8		167.143	C11H19O	389264
159.03	C6H7O5	997123		169.049	C8H9O4	438300
159.045	C10H7O2	33600.7		169.085	C9H13O3	79602300
159.066	C7H11O4	2429240		169.101	C13H13	189616
159.103	C8H15O3	137144		169.122	C10H17O2	238164000
161.009	C5H5O6	33265.6		169.158	C11H21O	11987.9
161.024	C9H5O3	15069		171.065	C8H11O4	3032250
161.046	C6H9O5	309187		171.08	C12H11O	42744.5
161.061	C10H9O2	441614		171.101	C9H15O3	44380800
161.082	C7H13O4	29811.9		171.116	C13H15	1329350
163.004	C8H3O4	376051		171.138	C10H19O2	6773550
163.025	C5H7O6	16738.5		173.06	C11H9O2	12443.8
163.04	C9H7O3	1831620		173.08	C8H13O4	3992310
163.061	C6H11O5	20428.9		173.096	C12H13O	68722.4
163.077	C10H11O2	1262980		173.117	C9H17O3	39690400
165.019	C8H5O4	589867		173.132	C13H17	2358750
165.041	C5H9O6	554403		175.06	C7H11O5	13015.6
165.056	C9H9O3	4720620		175.075	C11H11O2	150794
165.092	C10H13O2	16144200		175.096	C8H15O4	1696650
166.999	C7H3O5	262184		175.111	C12H15O	630164
167.014	C11H3O2	42858.9		175.132	C9H19O3	66920.3
167.035	C8H7O4	2322950		175.148	C13H19	2467570
167.071	C9H11O3	6988000		177.054	C10H9O3	155021
167.108	C10H15O2	3644250		177.09	C11H13O2	1477980
169.014	C7H5O5	1267040		177.112	C8H17O4	4162820
169.051	C8H9O4	5670490		177.127	C12H17O	1270540
169.087	C9H13O3	8124180		177.163	C13H21	229741
169.123	C10H17O2	991703		179.07	C10H11O3	7266920
170.994	C6H3O6	56413.3		179.106	C11H15O2	13504300
171.03	C7H7O5	2651970		179.143	C12H19O	2370310
171.066	C8H11O4	5454320		179.179	C13H23	17111.5
171.103	C9H15O3	949814		181.049	C9H9O4	134426
171.139	C10H19O2	1049970		181.085	C10H13O3	39288300
173.009	C6H5O6	146005		181.101	C14H13	18466.6
173.046	C7H9O5	2666390		181.107	C7H17O5	11006.8
173.061	C11H9O2	35268.7		181.122	C11H17O2	48758500
173.082	C8H13O4	1179360		181.158	C12H21O	28506.6
173.118	C9H17O3	193599		183.065	C9H11O4	3464270
175.025	C6H7O6	139035		183.101	C10H15O3	367471000
175.04	C10H7O3	70940.3		183.116	C14H15	10139.6
175.061	C7H11O5	442242		183.138	C11H19O2	3264680
175.077	C11H11O2	128380		185.08	C9H13O4	19590000
175.098	C8H15O4	14223.4		185.096	C13H13O	132887
177.019	C9H5O4	120983		185.117	C10H17O3	334008000
177.041	C6H9O6	16573.4		185.132	C14H17	48615.1
177.056	C10H9O3	810832		185.153	C11H21O2	115418
177.077	C7H13O5	32121.6		187.06	C8H11O5	39773.2
177.092	C11H13O2	48657.9		187.075	C12H11O2	85869.7
178.999	C8H3O5	90022.9		187.096	C9H15O4	11002400
179.035	C9H7O4	1593520		187.111	C13H15O	1378040
179.056	C6H11O6	14320.6		187.132	C10H19O3	7870010
179.071	C10H11O3	4074590		187.148	C14H19	115130
179.108	C11H15O2	131647		189.075	C8H13O5	164947
181.014	C8H5O5	450667		189.091	C12H13O2	1521580
181.051	C9H9O4	5409220		189.112	C9H17O4	3747150
181.087	C10H13O3	32329700		189.127	C13H17O	848777
181.124	C11H17O2	16620.4		189.148	C10H21O3	79359.9
182.994	C7H3O6	60400.8		189.163	C14H21	59027.6
183.03	C8H7O5	1301360		191.07	C11H11O3	24155.3
183.066	C9H11O4	9732260		191.091	C8H15O5	764386
183.103	C10H15O3	12035000		191.106	C12H15O2	1674760
183.139	C11H19O2	30584.7		191.143	C13H19O	1699340
185.009	C7H5O6	254159		191.179	C14H23	224591
185.046	C8H9O5	2893700		193.049	C10H9O4	46510.7
185.082	C9H13O4	9704090		193.086	C11H13O3	2932700
185.118	C10H17O3	1045840		193.107	C8H17O5	34070.7
185.155	C11H21O2	197551		193.122	C12H17O2	3562930
187.025	C7H7O6	398593		193.143	C9H21O4	51611.7
187.04	C11H7O3	16211.1		193.158	C13H21O	692417
187.061	C8H11O5	2858620		195.065	C10H11O4	1603360
187.077	C12H11O2	23288.8		195.101	C11H15O3	5247380
187.098	C9H15O4	572468		195.117	C15H15	18034.1
187.134	C10H19O3	535753		195.138	C12H19O2	3127370
189.004	C6H5O7	11827		195.174	C13H23O	21529.3
189.019	C10H5O4	11143.1		197.08	C10H13O4	11470400
189.041	C7H9O6	333898		197.117	C11H17O3	9484210
189.056	C11H9O3	156733		197.132	C15H17	10808.3
189.077	C8H13O5	496570		197.153	C12H21O2	569680
189.092	C12H13O2	70462.8		197.19	C13H25O	10739.4
189.113	C9H17O4	42389.8		199.038	C12H7O3	9135.2
190.999	C9H3O5	121247		199.06	C9H11O5	205238
191.02	C6H7O7	117527		199.096	C10H15O4	31301600
191.035	C10H7O4	138747		199.111	C14H15O	26986.7
191.056	C7H11O6	63450.9		199.132	C11H19O3	5810850
191.071	C11H11O3	54625		199.148	C15H19	702968
191.093	C8H15O5	14928.6		199.169	C12H23O2	42584.8
191.108	C12H15O2	128346		201.075	C9H13O5	1544660
193.014	C9H5O5	108267		201.091	C13H13O2	490664
193.036	C6H9O7	12204.7		201.112	C10H17O4	27010800
193.051	C10H9O4	1104430		201.127	C14H17O	1306340
193.072	C7H13O6	38030.5		201.148	C11H21O3	163422
193.087	C11H13O3	121569		201.163	C15H21	659857
193.124	C12H17O2	63219.7		203.07	C12H11O3	41430.9
194.994	C8H3O6	22834.3		203.091	C9H15O5	839879
195.03	C9H7O5	880201		203.106	C13H15O2	2298710
195.066	C10H11O4	4988370		203.127	C10H19O4	1202300
195.103	C11H15O3	88381.2		203.142	C14H19O	759034
195.139	C12H19O2	48509.7		203.179	C15H23	64340
197.009	C8H5O6	130658		205.086	C12H13O3	2255570
197.046	C9H9O5	2783440		205.107	C9H17O5	89236
197.082	C10H13O4	33471800		205.122	C13H17O2	4485370
197.118	C11H17O3	40438.1		205.143	C10H21O4	11331.8
197.155	C12H21O2	25201.4		205.158	C14H21O	197484
198.989	C7H3O7	24724.8		205.195	C15H25	145311
199.025	C8H7O6	374363		207.065	C11H11O4	125210
199.061	C9H11O5	5140190		207.101	C12H15O3	2808790
199.098	C10H15O4	10122800		207.117	C16H15	11780.8
199.134	C11H19O3	118098		207.122	C9H19O5	2604580
199.17	C12H23O2	298805		207.137	C13H19O2	2000650
201.004	C7H5O7	21285.7		207.174	C14H23O	1103710
201.041	C8H9O6	571921		209.08	C11H13O4	1465200
201.077	C9H13O5	3942260		209.117	C12H17O3	4300850
201.092	C13H13O2	24788.8		209.132	C16H17	47470.8
201.113	C10H17O4	741941		209.153	C13H21O2	4513160
201.15	C11H21O3	10003.9		209.189	C14H25O	66291.9
203.02	C7H7O7	48111.7		211.06	C10H11O5	118470
203.035	C11H7O4	67875.3		211.096	C11H15O4	4338610
203.056	C8H11O6	643511		211.111	C15H15O	109075
203.072	C12H11O3	180171		211.132	C12H19O3	3859370
203.093	C9H15O5	353688		211.148	C16H19	11526.2
203.108	C13H15O2	41470.1		211.169	C13H23O2	523420
203.129	C10H19O4	18215.4		213.075	C10H13O5	1600980
205.014	C10H5O5	31415.6		213.091	C14H13O2	18174.4
205.035	C7H9O7	61264		213.112	C11H17O4	5817780
205.051	C11H9O4	47451		213.127	C15H17O	473221
205.072	C8H13O6	129641		213.148	C12H21O3	1139700
205.087	C12H13O3	40592.9		213.163	C16H21	970778
205.108	C9H17O5	70593.3		213.184	C13H25O2	30691.2
205.124	C13H17O2	41550		215.091	C10H15O5	4565010
206.994	C9H3O6	286804		215.106	C14H15O2	30724.3
207.03	C10H7O5	157432		215.127	C11H19O4	2968820
207.051	C7H11O7	117521		215.143	C15H19O	1793250
207.066	C11H11O4	140255		215.164	C12H23O3	68975.2
207.088	C8H15O6	59961.2		215.179	C16H23	550879
207.103	C12H15O3	41660.6		217.07	C9H13O6	20505.8
207.139	C13H19O2	33669.6		217.086	C13H13O3	249845
209.009	C9H5O6	63029.9		217.106	C10H17O5	4413740
209.046	C10H9O5	740185		217.122	C14H17O2	983973
209.067	C7H13O7	22266.9		217.143	C11H21O4	202460
209.082	C11H13O4	204317		217.158	C15H21O	1521650
209.118	C12H17O3	35994.9		217.194	C16H25	3105910
209.155	C13H21O2	31037		219.065	C12H11O4	9050.52
211.025	C9H7O6	289484		219.086	C9H15O6	31526.4
211.061	C10H11O5	2831140		219.101	C13H15O3	2366930
211.098	C11H15O4	210227		219.122	C10H19O5	404423
211.134	C12H19O3	172563		219.138	C14H19O2	4026550
213.004	C8H5O7	18401.8		219.174	C15H23O	102521
213.041	C9H9O6	812044		221.08	C12H13O4	825421
213.077	C10H13O5	22727800		221.117	C13H17O3	5899600
213.113	C11H17O4	181786		221.138	C10H21O5	14724.4
213.15	C12H21O3	101250		221.153	C14H21O2	5170000
213.186	C13H25O2	154170		221.19	C15H25O	501395
215.02	C8H7O7	57383.8		223.061	C11H11O5	11088.8
215.056	C9H11O6	1504480		223.096	C12H15O4	3586170
215.071	C13H11O3	22743.5		223.132	C13H19O3	3886730
215.093	C10H15O5	5914080		223.148	C17H19	254001
215.129	C11H19O4	44933.2		223.169	C14H23O2	1663480
215.165	C12H23O3	13399.1		223.205	C15H27O	2687680
217.035	C8H9O7	104586		225.06	C7H13O8	32187.2
217.051	C12H9O4	28972.1		225.075	C11H13O5	273618
217.072	C9H13O6	1017620		225.112	C12H17O4	5186460
217.087	C13H13O3	10951		225.127	C16H17O	87378.6
217.108	C10H17O5	676956		225.148	C13H21O3	3532280
217.124	C14H17O2	10090		225.163	C17H21	1557390
218.994	C10H3O6	12243		225.184	C14H25O2	377402
219.015	C7H7O8	34918.7		227.091	C11H15O5	1412230
219.03	C11H7O5	9228.91		227.106	C15H15O2	45479.1
219.051	C8H11O7	134108		227.127	C12H19O4	3144220
219.066	C12H11O4	37412.8		227.143	C16H19O	55824
219.087	C9H15O6	76665.6		227.164	C13H23O3	1525770
219.103	C13H15O3	16525.5		227.179	C17H23	7324550
219.124	C10H19O5	25029.2		227.2	C14H27O2	324640
219.139	C14H19O2	130384		229.07	C10H13O6	9453.35
221.009	C10H5O6	50009.2		229.086	C14H13O3	50077.8
221.046	C11H9O5	63737.6		229.106	C11H17O5	1261990
221.067	C8H13O7	11209.4		229.122	C15H17O2	63537.6
221.082	C12H13O4	193406		229.143	C12H21O4	803320
221.103	C9H17O6	25446.7		229.158	C16H21O	1734450
221.119	C13H17O3	245237		229.179	C13H25O3	25233.1
222.989	C9H3O7	55095.2		229.195	C17H25	16631000
223.025	C10H7O6	77317.8		231.086	C10H15O6	506999
223.061	C11H11O5	153245		231.101	C14H15O3	36766.3
223.083	C8H15O7	11134.2		231.122	C11H19O5	983358
223.098	C12H15O4	91494.9		231.138	C15H19O2	2510800
223.134	C13H19O3	57650.7		231.159	C12H23O4	159978
225.004	C9H5O7	30921.3		231.174	C16H23O	5556390
225.041	C10H9O6	335007		231.21	C17H27	3896970
225.077	C11H13O5	264311		233.08	C13H13O4	70237.2
225.113	C12H17O4	86932.4		233.102	C10H17O6	215332
225.15	C13H21O3	34832.3		233.117	C14H17O3	3118130
225.186	C14H25O2	13143.6		233.138	C11H21O5	23605
227.02	C9H7O7	70706.8		233.153	C15H21O2	5673550
227.056	C10H11O6	1152910		233.174	C12H25O4	37391.6
227.093	C11H15O5	314205		233.19	C16H25O	1630260
227.129	C12H19O4	84263.1		235.096	C13H15O4	1289130
227.165	C13H23O3	45365.5		235.117	C10H19O6	15284
227.202	C14H27O2	411071		235.132	C14H19O3	3792650
229.035	C9H9O7	161411		235.154	C11H23O5	45853.8
229.072	C10H13O6	9581080		235.169	C15H23O2	3925520
229.087	C14H13O3	60473.2		235.205	C16H27O	36891.1
229.108	C11H17O5	167032		237.075	C12H13O5	68184.1
229.144	C12H21O4	31033.6		237.112	C13H17O4	3730120
230.994	C11H3O6	51200.3		237.148	C14H21O3	2905940
231.015	C8H7O8	16944.8		237.184	C15H25O2	1226430
231.051	C9H11O7	267639		239.091	C12H15O5	756673
231.066	C13H11O4	73188.8		239.127	C13H19O4	2949360
231.087	C10H15O6	1990610		239.142	C17H19O	349374
231.103	C14H15O3	128861		239.164	C14H23O3	2788480
231.124	C11H19O5	45478.5		239.179	C18H23	233249
231.176	C16H23O	64869.9		239.2	C15H27O2	1158780
232.973	C10HO7	27462.2		241.107	C12H17O5	1054920
233.009	C11H5O6	53761.8		241.122	C16H17O2	104423
233.03	C8H9O8	10440.6		241.143	C13H21O4	2763150
233.046	C12H9O5	9198.18		241.158	C17H21O	1577770
233.067	C9H13O7	391468		241.179	C14H25O3	545695
233.082	C13H13O4	38007.5		241.195	C18H25	2134590
233.103	C10H17O6	344295		241.216	C15H29O2	1026180
233.118	C14H17O3	247575		243.086	C11H15O6	92773
233.155	C15H21O2	208561		243.101	C15H15O3	92648.1
234.989	C10H3O7	102733		243.122	C12H19O5	787702
235.025	C11H7O6	21906.1		243.137	C16H19O2	199063
235.046	C8H11O8	79733		243.158	C13H23O4	2069370
235.061	C12H11O5	52905.8		243.174	C17H23O	1525330
235.082	C9H15O7	10456.9		243.195	C14H27O3	24564.1
235.098	C13H15O4	118859		243.21	C18H27	807972
235.119	C10H19O6	111741		245.101	C11H17O6	13657.2
235.134	C14H19O3	23190		245.117	C15H17O3	90162.2
237.004	C10H5O7	17574.9		245.138	C12H21O5	348762
237.041	C11H9O6	52575.2		245.153	C16H21O2	1094400
237.062	C8H13O8	117258		245.174	C13H25O4	225181
237.077	C12H13O5	143919		245.19	C17H25O	5688420
237.098	C9H17O7	17282.9		245.226	C18H29	115959
237.113	C13H17O4	49422.6		247.081	C10H15O7	21390.9
237.15	C14H21O3	100734		247.096	C14H15O4	470032
238.984	C9H3O8	11496.7		247.117	C11H19O6	41979.1
239.02	C10H7O7	45579.5		247.132	C15H19O3	1094940
239.056	C11H11O6	140384		247.154	C12H23O5	3314880
239.093	C12H15O5	138545		247.169	C16H23O2	6739260
239.129	C13H19O4	365883		247.205	C17H27O	2037230
240.999	C9H5O8	9195.37		247.226	C14H31O3	10748.3
241.036	C10H9O7	100468		249.112	C14H17O4	1904300
241.057	C7H13O9	17847.4		249.133	C11H21O6	12790.4
241.072	C11H13O6	183423		249.148	C15H21O3	1751930
241.108	C12H17O5	115982		249.169	C12H25O5	40452.1
241.145	C13H21O4	41608.6		249.184	C16H25O2	2009910
241.181	C14H25O3	67973.1		249.206	C13H29O4	187489
241.217	C15H29O2	303318		249.221	C17H29O	13438.4
243.015	C9H7O8	11308.6		251.091	C13H15O5	25398.3
243.051	C10H11O7	291419		251.127	C14H19O4	1794840
243.087	C11H15O6	215751		251.164	C15H23O3	2959300
243.103	C15H15O3	49274.3		251.185	C12H27O5	385516
243.124	C12H19O5	79345.8		251.2	C16H27O2	695084
243.16	C13H23O4	10986.3		253.107	C13H17O5	834974
245.009	C12H5O6	45766.5		253.122	C17H17O2	11677.6
245.03	C9H9O8	27302.8		253.143	C14H21O4	3278160
245.067	C10H13O7	4042070		253.179	C15H25O3	574194
245.082	C14H13O4	125147		253.216	C16H29O2	36928.6
245.103	C11H17O6	235460		255.086	C12H15O6	15651.9
245.118	C15H17O3	95334.8		255.122	C13H19O5	1133070
245.139	C12H21O5	61323.1		255.137	C17H19O2	374789
246.989	C11H3O7	22112.6		255.159	C14H23O4	2152430
247.025	C12H7O6	51658.4		255.195	C15H27O3	14953.7
247.046	C9H11O8	76967.8		255.21	C19H27	1306020
247.061	C13H11O5	12198		255.231	C16H31O2	50921.6
247.082	C10H15O7	490565		257.102	C12H17O6	126290
247.098	C14H15O4	39457.2		257.117	C16H17O3	156006
247.119	C11H19O6	109798		257.138	C13H21O5	1233160
247.134	C15H19O3	108640		257.153	C17H21O2	2978890
247.17	C16H23O2	97963.8		257.174	C14H25O4	157426
248.973	C3H5O13	44789.7		257.189	C18H25O	1027350
249.004	C11H5O7	14730.1		257.211	C15H29O3	398058
249.04	C12H9O6	18756.4		257.226	C19H29	2212310
249.062	C9H13O8	67457.5		259.117	C12H19O6	32608.4
249.077	C13H13O5	50355.2		259.132	C16H19O3	1191300
249.098	C10H17O7	141296		259.154	C13H23O5	245920
249.113	C14H17O4	32795.8		259.169	C17H23O2	1870610
249.135	C11H21O6	57234		259.19	C14H27O4	287756
249.15	C15H21O3	14478.1		259.205	C18H27O	933794
250.983	C10H3O8	34524.7		259.226	C15H31O3	167815
251.02	C11H7O7	10846.9		259.242	C19H31	63959.7
251.056	C12H11O6	46775.2		261.112	C15H17O4	24855.6
251.077	C9H15O8	210013		261.133	C12H21O6	331375
251.093	C13H15O5	84067.1		261.148	C16H21O3	1354300
251.114	C10H19O7	140540		261.169	C13H25O5	14469.1
251.129	C14H19O4	50537.9		261.184	C17H25O2	7123890
252.999	C10H5O8	35214.5		261.221	C18H29O	172895
253.035	C11H9O7	32543.4		263.091	C14H15O5	64330.5
253.072	C12H13O6	106527		263.127	C15H19O4	603026
253.108	C13H17O5	69374.2		263.148	C12H23O6	1451940
253.145	C14H21O4	46654		263.163	C16H23O3	3397510
253.217	C16H29O2	27328.6		263.2	C17H27O2	2182590
255.015	C10H7O8	11033.1		265.107	C14H17O5	216248
255.051	C11H11O7	66825.3		265.143	C15H21O4	1481950
255.088	C12H15O6	104871		265.158	C19H21O	11240.8
255.124	C13H19O5	73222.3		265.179	C16H25O3	5840130
255.16	C14H23O4	17301.8		265.195	C20H25	701237
255.197	C15H27O3	37400		265.216	C17H29O2	154024
255.233	C16H31O2	629944		265.252	C18H33O	26516.6
257.009	C13H5O6	20250.8		267.122	C14H19O5	328276
257.03	C10H9O8	17477.8		267.158	C15H23O4	1681550
257.067	C11H13O7	75202		267.174	C19H23O	109591
257.103	C12H17O6	100615		267.195	C16H27O3	152498
257.118	C16H17O3	41098.5		267.21	C20H27	673092
257.139	C13H21O5	14028.3		267.232	C17H31O2	25045.4
257.176	C14H25O4	13393		269.101	C13H17O6	13765.6
259.025	C13H7O6	16005		269.138	C14H21O5	1100410
259.046	C10H11O8	43870.8		269.153	C18H21O2	250980
259.082	C11H15O7	113222		269.174	C15H25O4	710184
259.098	C15H15O4	103405		269.189	C19H25O	75545.4
259.119	C12H19O6	139214		269.211	C16H29O3	75791.3
259.134	C16H19O3	69560.2		269.226	C20H29	3076330
259.155	C13H23O5	44224.1		269.247	C17H33O2	87102.8
261.004	C12H5O7	11201.6		271.117	C13H19O6	308069
261.025	C9H9O9	10693.2		271.132	C17H19O3	11450.8
261.041	C13H9O6	36424.5		271.154	C14H23O5	978858
261.061	C10H13O8	955306		271.168	C18H23O2	132361
261.077	C14H13O5	21451.7		271.19	C15H27O4	195621
261.098	C11H17O7	157869		271.205	C19H27O	253076
261.113	C15H17O4	13277.3		271.242	C20H31	31567200
261.134	C12H21O6	81427.3		273.112	C16H17O4	69841.8
261.15	C16H21O3	57105.8		273.133	C13H21O6	213598
263.02	C12H7O7	79487		273.148	C17H21O3	1961430
263.041	C9H11O9	32764.4		273.169	C14H25O5	120786
263.056	C13H11O6	20384.4		273.184	C18H25O2	2472140
263.077	C10H15O8	86269.9		273.205	C15H29O4	12005.6
263.092	C14H15O5	70373		273.221	C19H29O	2498320
263.114	C11H19O7	122029		273.257	C20H33	9665880
263.129	C15H19O4	272411		275.112	C12H19O7	29447.9
263.15	C12H23O6	11549.3		275.127	C16H19O4	1206510
264.999	C11H5O8	22931.1		275.148	C13H23O6	35494.3
265.035	C12H9O7	14838.5		275.164	C17H23O3	5413280
265.057	C9H13O9	65582.8		275.237	C19H31O	370341
265.072	C13H13O6	52266.8		277.107	C15H17O5	9424.47
265.093	C10H17O8	9225.9		277.128	C12H21O7	132830
265.108	C14H17O5	62245.7		277.143	C16H21O4	973598
265.129	C11H21O7	61663.4		277.179	C17H25O3	5327920
265.145	C15H21O4	112972		277.215	C18H29O2	66429.6
266.978	C10H3O9	24756.5		279.101	C18H15O3	15070.4
267.015	C11H7O8	73400.9		279.122	C15H19O5	501684
267.051	C12H11O7	43095.9		279.143	C12H23O7	48561.7
267.072	C9H15O9	12171		279.158	C16H23O4	7968060
267.087	C13H15O6	82421.8		279.174	C20H23O	88981.5
267.109	C10H19O8	12933.5		279.195	C17H27O3	7826530
267.124	C14H19O5	53778.2		279.231	C18H31O2	67760.3
267.16	C15H23O4	9627.19		281.102	C14H17O6	111473
269.03	C11H9O8	12622.7		281.138	C15H21O5	552230
269.067	C12H13O7	67157		281.174	C16H25O4	3701310
269.103	C13H17O6	72409.1		281.19	C20H25O	1367440
269.139	C14H21O5	31480.6		281.21	C17H29O3	119234
269.176	C15H25O4	22065.7		281.247	C18H33O2	22641.1
269.212	C16H29O3	92545.4		283.117	C14H19O6	121304
269.249	C17H33O2	65545.1		283.153	C15H23O5	926747
271.046	C11H11O8	26607.7		283.19	C16H27O4	556965
271.082	C12H15O7	58407.2		283.205	C20H27O	984528
271.098	C16H15O4	15460.2		283.226	C17H31O3	53247.4
271.119	C13H19O6	37389.5		283.263	C18H35O2	21738.7
271.134	C17H19O3	28714.2		285.148	C18H21O3	9069.99
271.155	C14H23O5	9365.71		285.169	C15H25O5	682600
271.192	C15H27O4	21753.7		285.184	C19H25O2	501893
271.228	C16H31O3	13017.8		285.206	C16H29O4	17764.3
273.004	C13H5O7	39767.8		285.22	C20H29O	3378670
273.025	C10H9O9	9923.95		287.127	C17H19O4	200253
273.062	C11H13O8	31663.4		287.148	C14H23O6	86945.7
273.098	C12H17O7	66857.4		287.164	C18H23O3	1147110
273.113	C16H17O4	108724		287.185	C15H27O5	24730.3
273.135	C13H21O6	422950		287.2	C19H27O2	4820750
273.15	C17H21O3	83008.5		287.222	C16H31O4	29554.6
273.171	C14H25O5	70190.7		287.236	C20H31O	17736700
275.02	C13H7O7	17806.1		289.107	C16H17O5	19541.3
275.041	C10H11O9	54408		289.128	C13H21O7	9141.66
275.056	C14H11O6	78699.5		289.143	C17H21O4	236800
275.077	C11H15O8	34610.9		289.164	C14H25O6	41091.3
275.093	C15H15O5	29525.7		289.179	C18H25O3	3065810
275.114	C12H19O7	65366.5		289.216	C19H29O2	6985730
275.129	C16H19O4	232940		289.252	C20H33O	2172220
275.15	C13H23O6	95211.6		291.122	C16H19O5	718735
275.165	C17H23O3	20574.3		291.159	C17H23O4	3488990
276.999	C12H5O8	11493.4		291.18	C14H27O6	11745.5
277.036	C13H9O7	87109.8		291.231	C19H31O2	3347960
277.057	C10H13O9	192816		293.138	C16H21O5	1949970
277.072	C14H13O6	29744.4		293.174	C17H25O4	9411180
277.093	C11H17O8	56651.2		293.211	C18H29O3	2983870
277.108	C15H17O5	47843.2		293.247	C19H33O2	30886.1
277.129	C12H21O7	65108.6		295.117	C15H19O6	9218.96
277.145	C16H21O4	13076		295.153	C16H23O5	1452950
277.181	C17H25O3	56773.5		295.169	C20H23O2	68631.2
279.015	C12H7O8	80766.4		295.19	C17H27O4	6690170
279.051	C13H11O7	28586.7		295.226	C18H31O3	42761.4
279.072	C10H15O9	20850.2		295.263	C19H35O2	28297.8
279.087	C14H15O6	63971.1		297.082	C10H17O10	1104540
279.109	C11H19O8	68447.8		297.133	C15H21O6	57391.1
279.124	C15H19O5	18122.8		297.148	C19H21O3	21492.2
279.16	C16H23O4	77498.8		297.169	C16H25O5	1754210
280.994	C11H5O9	20655.1		297.184	C20H25O2	49063.2
281.03	C12H9O8	10450.9		297.205	C17H29O4	837180
281.067	C13H13O7	53926.8		297.242	C18H33O3	71030.1
281.088	C10H17O9	93007.9		297.278	C19H37O2	36657.9
281.103	C14H17O6	58757.1		299.148	C15H23O6	69555.6
281.124	C11H21O8	72596.9		299.164	C19H23O3	26370.7
281.139	C15H21O5	15723.5		299.184	C16H27O5	299863
282.988	C14H3O7	9199.06		299.2	C20H27O2	2109800
283.046	C12H11O8	25319.5		299.222	C17H31O4	25637.4
283.082	C13H15O7	57379.6		299.237	C21H31O	26331.5
283.119	C14H19O6	55606.6		301.143	C18H21O4	131784
283.155	C15H23O5	11105.4		301.164	C15H25O6	93264.3
283.192	C16H27O4	9491.81		301.179	C19H25O3	857770
283.264	C18H35O2	85707.8		301.201	C16H29O5	54446.9
285.025	C11H9O9	47865.2		301.215	C20H29O2	9413800
285.062	C12H13O8	35420.4		301.252	C21H33O	58045.1
285.098	C13H17O7	47013.2		303.122	C17H19O5	57780.5
285.113	C17H17O4	15212.3		303.144	C14H23O7	51892.3
285.134	C14H21O6	25297.4		303.158	C18H23O4	244418
285.171	C15H25O5	259409		303.18	C15H27O6	16129.8
285.207	C16H29O4	18041.2		303.195	C19H27O3	5236580
287.041	C11H11O9	61769		303.216	C16H31O5	16367.8
287.077	C12H15O8	26870.9		303.231	C20H31O2	22962000
287.093	C16H15O5	53569.4		305.138	C17H21O5	684614
287.114	C13H19O7	35537.9		305.16	C14H25O7	14392.7
287.129	C17H19O4	110673		305.174	C18H25O4	4096330
287.15	C14H23O6	490693		305.196	C15H29O6	18640.7
287.187	C15H27O5	237297		305.21	C19H29O3	11599600
288.999	C13H5O8	25280.2		305.247	C20H33O2	16924600
289.036	C14H9O7	35406.8		307.117	C16H19O6	11715.9
289.057	C11H13O9	107976		307.154	C17H23O5	2101410
289.072	C15H13O6	14038.7		307.19	C18H27O4	10598400
289.093	C12H17O8	34895.8		307.226	C19H31O3	8816060
289.108	C16H17O5	12059.4		307.263	C20H35O2	143898
289.13	C13H21O7	590797		309.133	C16H21O6	324434
289.145	C17H21O4	181043		309.164	C24H21	69660.9
289.166	C14H25O6	148171		309.169	C17H25O5	5013870
291.015	C13H7O8	12822.3		309.206	C18H29O4	6947150
291.051	C14H11O7	10738.9		309.242	C19H33O3	61879.8
291.072	C11H15O9	9497.99		309.278	C20H37O2	15119.4
291.088	C15H15O6	32428.3		311.148	C16H23O6	874344
291.109	C12H19O8	19065.5		311.164	C20H23O3	30370.9
291.124	C16H19O5	32978.1		311.18	C24H23	209139
291.145	C13H23O7	124681		311.185	C17H27O5	5167410
291.16	C17H23O4	140030		311.2	C21H27O2	18205.4
293.031	C13H9O8	86268.1		311.221	C18H31O4	1600310
293.052	C10H13O10	10059.7		311.257	C19H35O3	15432.1
293.067	C14H13O7	33862.8		311.273	C23H35	44267.2
293.088	C11H17O9	21456		313.143	C19H21O4	16858.5
293.103	C15H17O6	34418.9		313.164	C16H25O6	1079810
293.124	C12H21O8	17610.4		313.179	C20H25O3	81684.4
293.14	C16H21O5	13013.5		313.195	C24H25	12934.9
293.176	C17H25O4	64826.7		313.2	C17H29O5	1595350
295.01	C12H7O9	19322		313.237	C18H33O4	101858
295.046	C13H11O8	19023.9		315.093	C10H19O11	45158
295.067	C10H15O10	43318.4		315.158	C19H23O4	23061.2
295.082	C14H15O7	49109.4		315.18	C16H27O6	44301.7
295.104	C11H19O9	27797		315.195	C20H27O3	2290510
295.119	C15H19O6	37301.4		315.216	C17H31O5	12303.7
295.155	C16H23O5	232176		315.232	C21H31O2	49460.2
297.026	C12H9O9	25430.2		317.159	C15H25O7	72078.6
297.062	C13H13O8	31128.8		317.174	C19H25O4	1148970
297.098	C14H17O7	38898.8		317.196	C16H29O6	371411
297.134	C15H21O6	19676.2		317.21	C20H29O3	8965000
297.171	C16H25O5	103519		317.247	C21H33O2	165643
299.02	C15H7O7	13257.9		317.306	C19H41O3	10020.5
299.041	C12H11O9	64236.8		319.14	C14H23O8	10224.1
299.077	C13H15O8	38906.2		319.154	C18H23O5	521744
299.114	C14H19O7	38939.2		319.176	C15H27O7	23618.9
299.15	C15H23O6	10936.1		319.189	C19H27O4	6240720
299.187	C16H27O5	25769.2		319.211	C16H31O6	53114.1
300.999	C14H5O8	10292.1		319.226	C20H31O3	37423300
301.036	C15H9O7	17706.4		319.263	C21H35O2	22506.5
301.057	C12H13O9	13628.8		321.133	C17H21O6	187564
301.093	C13H17O8	25948.6		321.164	C25H21	10165.7
301.108	C17H17O5	62437.4		321.169	C18H25O5	2377490
301.129	C14H21O7	25585.4		321.205	C19H29O4	19349500
301.145	C18H21O4	34161		321.241	C20H33O3	25580200
301.166	C15H25O6	519790		323.148	C17H23O6	595997
301.239	C17H33O4	11025.9		323.221	C19H31O4	17267900
303.015	C14H7O8	18875.7		323.257	C20H35O3	301806
303.036	C11H11O10	21629.7		325.143	C20H21O4	25729
303.052	C15H11O7	61309.7		325.164	C17H25O6	1981700
303.072	C12H15O9	190692		325.195	C25H25	83097.6
303.088	C16H15O6	128525		325.2	C18H29O5	4574970
303.109	C13H19O8	25452.5		325.237	C19H33O4	1342580
303.124	C17H19O5	18398.8		325.252	C23H33O	20921.4
303.145	C14H23O7	9286.75		325.273	C20H37O3	310218
303.16	C18H23O4	23617.3		325.31	C21H41O2	12377.1
303.182	C15H27O6	267043		327.007	C23H3O3	3412570
303.197	C19H27O3	12107.9		327.143	C16H23O7	122043
305.031	C14H9O8	38807		327.179	C17H27O6	2688450
305.052	C11H13O10	14371.1		327.216	C18H31O5	1532020
305.067	C15H13O7	18576.8		327.252	C19H35O4	14784.6
305.088	C12H17O9	297641		327.289	C20H39O3	130175
305.103	C16H17O6	37903.4		329.108	C11H21O11	14831.3
305.125	C13H21O8	526099		329.174	C20H25O4	699284
305.14	C17H21O5	11666.1		329.195	C17H29O6	308088
305.161	C14H25O7	205729		329.211	C21H29O3	16269.1
305.176	C18H25O4	18569.7		329.231	C18H33O5	78192.1
307.01	C13H7O9	17152.3		331.002	C22H3O4	3355990
307.046	C14H11O8	13418.1		331.009	C15H7O9	10212.8
307.067	C11H15O10	97207.9		331.175	C16H27O7	18137.4
307.083	C15H15O7	28169		331.19	C20H27O4	4423540
307.104	C12H19O9	9164.49		331.212	C17H31O6	159041
307.119	C16H19O6	35871.9		331.226	C21H31O3	19569.2
307.14	C13H23O8	123301		333.165	C26H21	136730
307.155	C17H23O5	12876.4		333.169	C19H25O5	261564
307.177	C14H27O7	22695.2		333.19	C16H29O7	11239.6
307.192	C18H27O4	12706.6		333.206	C20H29O4	19844100
309.026	C13H9O9	25879.9		333.242	C21H33O3	442866
309.047	C10H13O11	6341.29		335.171	C15H27O8	38301.5
309.062	C14H13O8	24024.7		335.185	C19H27O5	7615410
309.07	C25H9	10628.3		335.221	C20H31O4	44345000
309.083	C11H17O10	333672		335.257	C21H35O3	40942.5
309.098	C15H17O7	41143.7		337.164	C18H25O6	1071850
309.12	C12H21O9	292646		337.2	C19H29O5	17595400
309.135	C16H21O6	27817.5		337.223	C16H33O7	13371.7
309.156	C13H25O8	17099.8		337.237	C20H33O4	124786000
309.171	C17H25O5	184634		339.143	C17H23O7	97292.9
311.02	C16H7O7	12279.9		339.174	C25H23O	52758.6
311.041	C13H11O9	63922.2		339.18	C18H27O6	3261980
311.05	C24H7O	11647.6		339.216	C19H31O5	7907650
311.078	C14H15O8	29488.9		339.252	C20H35O4	3008350
311.086	C25H11	17756.4		341.158	C17H25O7	97749.3
311.099	C11H19O10	47935.1		341.19	C25H25O	15677.9
311.114	C15H19O7	30969.6		341.195	C18H29O6	3193150
311.15	C16H23O6	19534.8		341.231	C19H33O5	1417720
311.187	C17H27O5	54522.3		341.247	C23H33O2	17058.5
313.036	C16H9O7	21119.4		341.268	C20H37O4	138578
313.057	C13H13O9	11937.4		343.174	C17H27O7	697702
313.093	C14H17O8	30622.6		343.211	C18H31O6	708369
313.13	C15H21O7	25456.2		343.263	C23H35O2	19670.1
313.145	C19H21O4	20272.2		343.284	C20H39O4	15738.3
313.166	C16H25O6	298837		345.19	C17H29O7	30388.2
313.203	C17H29O5	23600.1		345.227	C18H33O6	1988520
315.015	C15H7O8	9350.42		345.242	C22H33O3	14555.8
315.036	C12H11O10	27583.2		345.299	C20H41O4	142982
315.072	C13H15O9	15556.4		347.17	C16H27O8	55320.8
315.109	C14H19O8	23264.7		347.185	C20H27O5	2883130
315.124	C18H19O5	31876.1		347.207	C17H31O7	121618
315.145	C15H23O7	14243.6		347.221	C21H31O4	717902
315.16	C19H23O4	10076.2		347.258	C22H35O3	21610.2
315.181	C16H27O6	90150.5		349.164	C19H25O6	606915
316.994	C14H5O9	13050.4		349.186	C16H29O8	50718.9
317.03	C15H9O8	12809.4		349.2	C20H29O5	5021890
317.052	C12H13O10	21492.3		349.237	C21H33O4	965558
317.067	C16H13O7	83895.4		351.166	C15H27O9	25184.9
317.088	C13H17O9	316270		351.18	C19H27O6	2872370
317.103	C17H17O6	12247.4		351.21	C27H27	12564.2
317.124	C14H21O8	19206.8		351.216	C20H31O5	16749000
317.14	C18H21O5	126634		351.253	C21H35O4	857918
317.161	C15H25O7	492753		353.159	C18H25O7	214501
317.176	C19H25O4	26329.2		353.195	C19H29O6	3213350
317.197	C16H29O6	24213.8		353.231	C20H33O5	21602900
319.01	C14H7O9	14298.6		353.268	C21H37O4	35657.3
319.046	C15H11O8	49087.3		355.211	C19H31O6	4815660
319.067	C12H15O10	56258.8		355.247	C20H35O5	4935590
319.083	C16H15O7	18314.9		357.227	C19H33O6	1407180
319.104	C13H19O9	10398.9		357.242	C23H33O3	16058.3
319.119	C17H19O6	31070.8		357.263	C20H37O5	48326.2
319.14	C14H23O8	544861		359.206	C18H31O7	941306
319.155	C18H23O5	154318		359.257	C23H35O3	23866
319.176	C15H27O7	225794		361.185	C17H29O8	41657.3
319.192	C19H27O4	28755.2		361.221	C18H33O7	848960
321.025	C14H9O9	16731.5		361.237	C22H33O4	196481
321.047	C11H13O11	10533.9		361.273	C23H37O3	15389.2
321.062	C15H13O8	11137.9		363.165	C16H27O9	15512.2
321.083	C12H17O10	111735		363.179	C20H27O6	1082780
321.098	C16H17O7	28441.2		363.202	C17H31O8	104023
321.119	C13H21O9	407137		363.216	C21H31O5	793651
321.134	C17H21O6	29799.9		363.253	C22H35O4	108407
321.156	C14H25O8	164144		365.181	C16H29O9	18376.1
321.171	C18H25O5	117876		365.195	C20H29O6	4982080
321.207	C19H29O4	17965.9		365.232	C21H33O5	1445930
323.005	C13H7O10	10802.9		365.268	C22H37O4	46299.7
323.041	C14H11O9	62169.2		365.32	C27H41	25769.9
323.063	C11H15O11	30926.8		367.174	C19H27O7	891825
323.077	C15H15O8	20993.3		367.21	C20H31O6	4765650
323.099	C12H19O10	154639		367.247	C21H35O5	2713270
323.114	C16H19O7	27883.2		367.299	C26H39O	9458.7
323.135	C13H23O9	91149.1		369.19	C19H29O7	1862370
323.15	C17H23O6	27350.6		369.227	C20H33O6	10743200
323.187	C18H27O5	67203.7		369.263	C21H37O5	56687.9
325	C16H5O8	12767.3		371.206	C19H31O7	1546180
325.021	C13H9O10	19846.8		371.242	C20H35O6	2840330
325.057	C14H13O9	12340.6		371.257	C24H35O3	18650.6
325.065	C25H9O	16909.6		371.315	C22H43O4	154462
325.078	C11H17O11	13685.3		373.097	C12H21O13	21566.2
325.093	C15H17O8	32176.2		373.221	C19H33O7	686829
325.115	C12H21O10	14026.3		373.236	C23H33O4	13882
325.13	C16H21O7	27390.5		373.258	C20H37O6	27128.8
325.166	C17H25O6	17789.8		373.274	C24H37O3	22052.3
325.202	C18H29O5	16048.9		375.201	C18H31O8	406486
327.015	C16H7O8	17949.4		375.253	C23H35O4	138945
327.036	C13H11O10	28376.8		375.29	C24H39O3	16889.7
327.072	C14H15O9	10926.2		375.306	C28H39	9000.48
327.094	C11H19O11	10616.1		377.18	C17H29O9	18592.3
327.109	C15H19O8	26099.4		377.231	C22H33O5	302525
327.145	C16H23O7	25790.6		377.268	C23H37O4	44904.9
327.182	C17H27O6	248051		377.305	C24H41O3	12952.5
327.218	C18H31O5	24856		379.247	C22H35O5	238173
329.03	C16H9O8	10259.3		379.284	C23H39O4	26883
329.052	C13H13O10	34280.3		379.299	C27H39O	9452.55
329.088	C14H17O9	18171.1		381.19	C20H29O7	1642200
329.104	C18H17O6	34747.7		381.226	C21H33O6	1416170
329.124	C15H21O8	20857.5		381.263	C22H37O5	98980
329.14	C19H21O5	43449.9		381.315	C27H41O	19131.9
329.161	C16H25O7	9723.55		383.169	C19H27O8	82728
329.176	C20H25O4	12723.4		383.206	C20H31O7	2958010
329.197	C17H29O6	67331.3		383.242	C21H35O6	1041990
331.01	C15H7O9	15446		383.279	C22H39O5	22731.3
331.046	C16H11O8	22511.9		385.185	C19H29O8	339492
331.067	C13H15O10	67417.7		385.2	C23H29O5	13007.3
331.083	C17H15O7	116087		385.221	C20H33O7	2219730
331.104	C14H19O9	431657		385.236	C24H33O4	26528.7
331.119	C18H19O6	121676		385.258	C21H37O6	140244
331.14	C15H23O8	21611.9		385.273	C25H37O3	24570.1
331.156	C19H23O5	125911		387.2	C19H31O8	405823
331.177	C16H27O7	185938		387.237	C20H35O7	1093640
331.192	C20H27O4	21391.2		387.252	C24H35O4	255686
331.213	C17H31O6	17604.6		387.288	C25H39O3	9831.57
333.026	C15H9O9	28229.5		389.216	C19H33O8	15405.4
333.047	C12H13O11	14551		389.253	C20H37O7	23810.9
333.062	C16H13O8	108207		389.268	C24H37O4	13372.8
333.083	C13H17O10	114657		389.305	C25H41O3	12658.2
333.098	C17H17O7	11133.5		391.108	C12H23O14	198057
333.119	C14H21O9	9435.94		391.247	C23H35O5	20664.8
333.135	C18H21O6	15604.9		391.284	C24H39O4	410886
333.156	C15H25O8	442259		391.32	C25H43O3	12574.1
333.171	C19H25O5	171734		393.263	C23H37O5	162384
333.192	C16H29O7	48556.5		393.299	C24H41O4	11297.6
333.208	C20H29O4	17943.1		395.242	C22H35O6	377499
335.041	C15H11O9	50691.8		395.279	C23H39O5	37685.9
335.063	C12H15O11	32901		395.294	C27H39O2	23468.8
335.078	C16H15O8	13920.1		395.315	C24H43O4	15979.4
335.099	C13H19O10	239872		397.185	C20H29O8	303921
335.114	C17H19O7	21191.9		397.221	C21H33O7	630991
335.135	C14H23O9	470326		397.258	C22H37O6	165042
335.15	C18H23O6	270013		397.31	C27H41O2	85037.4
335.172	C15H27O8	118158		399.201	C20H31O8	758605
335.187	C19H27O5	136102		399.237	C21H35O7	568746
335.223	C20H31O4	11673.9		399.252	C25H35O4	28833.7
337.021	C14H9O10	20854.7		399.273	C22H39O6	63483.5
337.057	C15H13O9	106784		399.289	C26H39O3	24920.9
337.078	C12H17O11	14741.8		401.216	C20H33O8	517233
337.093	C16H17O8	18592.1		401.231	C24H33O5	82276.5
337.115	C13H21O10	212925		401.253	C21H37O7	55268.9
337.13	C17H21O7	31193.3		401.268	C25H37O4	58447.7
337.151	C14H25O9	92102.6		401.305	C26H41O3	22508.9
337.166	C18H25O6	12356.8		403.232	C20H35O8	1345770
337.202	C19H29O5	75601.4		403.247	C24H35O5	17066.1
337.239	C20H33O4	49277.9		403.269	C21H39O7	12518.8
339.015	C17H7O8	10634.3		403.284	C25H39O4	41889.2
339.036	C14H11O10	12707		405.263	C24H37O5	171569
339.072	C15H15O9	16624.8		405.3	C25H41O4	20928.2
339.094	C12H19O11	53580.9		405.351	C30H45	16605.8
339.108	C16H19O8	20901.3		407.242	C23H35O6	27033.5
339.13	C13H23O10	18479.2		407.279	C24H39O5	119535
339.145	C17H23O7	28654.8		407.315	C25H43O4	39366.5
339.181	C18H27O6	11714.6		407.367	C30H47	20142.8
339.218	C19H31O5	34276		409.258	C23H37O6	277607
340.994	C16H5O9	17394.7		409.296	C24H41O5	9666.61
341.031	C17H9O8	20966.5		409.331	C25H45O4	32867.7
341.052	C14H13O10	34873.6		411.237	C22H35O7	18441.1
341.088	C15H17O9	11342.3		411.274	C23H39O6	91739.3
341.124	C16H21O8	23310.7		411.289	C27H39O3	20378.2
341.161	C17H25O7	31042.4		411.31	C24H43O5	11747.1
341.197	C18H29O6	157696		413.216	C21H33O8	263377
341.233	C19H33O5	32385		413.252	C22H37O7	193213
343.01	C16H7O9	12452.5		413.268	C26H37O4	29894.1
343.046	C17H11O8	14249.7		413.289	C23H41O6	33937.8
343.067	C14H15O10	59721.9		413.304	C27H41O3	106655
343.083	C18H15O7	25622.1		415.247	C25H35O5	87308.2
343.104	C15H19O9	377076		415.268	C22H39O7	46444.2
343.119	C19H19O6	34141.3		415.284	C26H39O4	49110.9
343.14	C16H23O8	26818.2		415.32	C27H43O3	32557
343.155	C20H23O5	19353.2		417.211	C20H33O9	130084
343.177	C17H27O7	526194		417.247	C21H37O8	65788.9
343.213	C18H31O6	55805.3		417.263	C25H37O5	154207
343.249	C19H35O5	15988.4		417.299	C26H41O4	10934.8
345.026	C16H9O9	19303.9		419.279	C25H39O5	78901.9
345.047	C13H13O11	18306.6		419.3	C22H43O7	29420.8
345.062	C17H13O8	37723.5		419.315	C26H43O4	21134.9
345.083	C14H17O10	122378		419.33	C30H43O	9655.94
345.098	C18H17O7	71486.9		421.258	C24H37O6	14397.3
345.12	C15H21O9	597299		421.295	C25H41O5	24550.5
345.135	C19H21O6	112613		421.346	C30H45O	15641.1
345.156	C16H25O8	13951.7		423.273	C24H39O6	156660
345.171	C20H25O5	36447.5		423.31	C25H43O5	82299.1
345.192	C17H29O7	138920		423.362	C30H47O	12392.5
345.229	C18H33O6	19966.7		425.253	C23H37O7	181529
347.041	C16H11O9	33104		425.289	C24H41O6	97666.1
347.062	C13H15O11	33674.4		425.326	C25H45O5	51198.1
347.078	C17H15O8	118960		427.231	C22H35O8	117609
347.099	C14H19O10	202577		427.268	C23H39O7	54616.5
347.114	C18H19O7	12149		427.283	C27H39O4	94655
347.135	C15H23O9	633662		427.305	C24H43O6	23869.4
347.15	C19H23O6	212186		427.32	C28H43O3	9555.25
347.171	C16H27O8	249483		427.341	C25H47O5	41079.2
347.187	C20H27O5	90373.1		429.088	C14H21O15	14279
347.208	C17H31O7	33149.5		429.247	C22H37O8	209233
349.021	C15H9O10	19617.7		429.262	C26H37O5	40047
349.057	C16H13O9	10043.7		429.284	C23H41O7	37941.2
349.078	C13H17O11	34062.4		429.299	C27H41O4	207895
349.093	C17H17O8	15885.5		431.19	C20H31O10	15180.9
349.114	C14H21O10	324212		431.263	C22H39O8	183946
349.129	C18H21O7	237661		431.279	C26H39O5	204140
349.151	C15H25O9	346559		431.315	C27H43O4	104082
349.166	C19H25O6	374231		433.206	C20H33O10	22360.9
349.187	C16H29O8	38315.6		433.257	C25H37O6	182307
349.202	C20H29O5	123280		433.294	C26H41O5	99821.4
351.036	C15H11O10	15273.5		435.273	C25H39O6	75646.1
351.072	C16H15O9	123569		435.31	C26H43O5	21995.1
351.094	C13H19O11	116513		435.325	C30H43O2	20275
351.109	C17H19O8	24902.9		437.289	C25H41O6	39687
351.13	C14H23O10	260733		437.326	C26H45O5	14628.1
351.145	C18H23O7	13393.6		437.341	C30H45O2	40174.7
351.166	C15H27O9	81705.2		439.268	C24H39O7	94122.9
351.181	C19H27O6	15691		439.305	C25H43O6	32860.2
351.218	C20H31O5	107738		439.32	C29H43O3	20747
352.994	C17H5O9	12472.1		439.356	C30H47O2	71374.3
353.051	C15H13O10	40851.1		441.248	C23H37O8	57204.9
353.073	C12H17O12	11911.5		441.284	C24H41O7	81858.4
353.088	C16H17O9	13635.2		441.321	C25H45O6	52518.8
353.109	C13H21O11	33610.5		441.335	C29H45O3	26222.4
353.124	C17H21O8	26539.2		443.263	C23H39O8	40653.2
353.146	C14H25O10	57549.5		443.279	C27H39O5	112301
353.161	C18H25O7	18941.5		443.301	C24H43O7	33698
353.197	C19H29O6	373251		443.315	C28H43O4	15697.8
353.234	C20H33O5	184225		445.119	C15H25O15	316586
355.01	C17H7O9	16754.4		445.257	C26H37O6	76283.3
355.047	C18H11O8	11987.4		445.278	C23H41O8	13962
355.068	C15H15O10	38451.7		445.294	C27H41O5	222725
355.104	C16H19O9	18111.8		447.258	C22H39O9	24112.6
355.14	C17H23O8	28535.2		447.273	C26H39O6	257211
355.176	C18H27O7	12391.8		447.309	C27H43O5	36420.6
355.213	C19H31O6	250982		449.028	C26H9O8	16606
355.249	C20H35O5	19446.2		449.234	C28H33O5	14678.8
357.026	C17H9O9	15631.3		449.289	C26H41O6	157339
357.047	C14H13O11	21211		449.325	C27H45O5	22870.9
357.062	C18H13O8	14725.8		451.268	C25H39O7	127542
357.083	C15H17O10	104717		451.304	C26H43O6	22249.9
357.099	C19H17O7	49605.5		451.32	C30H43O3	49101.2
357.119	C16H21O9	11386.8		453.075	C30H13O5	9740.66
357.135	C20H21O6	9171.53		453.284	C25H41O7	80449.1
357.156	C17H25O8	33990.5		453.322	C26H45O6	36313.6
357.192	C18H29O7	337958		453.336	C30H45O3	158422
357.229	C19H33O6	91485.4		455.264	C24H39O8	15030.6
357.265	C20H37O5	14265.9		455.3	C25H43O7	34630.4
359.041	C17H11O9	12436.2		455.315	C29H43O4	55283.9
359.063	C14H15O11	41599		455.337	C26H47O6	14366.2
359.078	C18H15O8	71694.6		455.351	C30H47O3	283799
359.099	C15H19O10	211371		457.295	C28H41O5	34929.5
359.114	C19H19O7	90424.8		457.316	C25H45O7	33610.8
359.135	C16H23O9	24564.4		457.33	C29H45O4	261401
359.15	C20H23O6	40942.3		457.367	C30H49O3	81310.1
359.171	C17H27O8	13560.9		459.273	C27H39O6	129225
359.208	C18H31O7	81721.2		459.309	C28H43O5	49253.6
359.244	C19H35O6	22061.2		459.346	C29H47O4	75037.3
361.057	C17H13O9	56856.9		461.273	C23H41O9	22938.6
361.078	C14H17O11	30462.7		461.289	C27H41O6	409991
361.093	C18H17O8	117472		461.325	C28H45O5	12619.9
361.115	C15H21O10	334927		463.254	C22H39O10	11082.8
361.13	C19H21O7	149324		463.268	C26H39O7	203295
361.151	C16H25O9	9272.56		463.305	C27H43O6	448721
361.166	C20H25O6	107702		465.284	C26H41O7	196956
361.187	C17H29O8	175579		465.32	C27H45O6	58683.4
361.224	C18H33O7	30197.5		467.263	C25H39O8	63631
363.036	C16H11O10	14081.9		467.3	C26H43O7	61564.7
363.073	C17H15O9	113063		467.315	C30H43O4	32251.3
363.094	C14H19O11	76659.7		469.279	C25H41O8	57404.8
363.109	C18H19O8	11112.6		469.316	C26H45O7	78216.5
363.13	C15H23O10	384979		469.33	C30H45O4	594555
363.146	C19H23O7	10658.9		471.295	C25H43O8	33030
363.166	C16H27O9	230813		471.31	C29H43O5	158403
363.182	C20H27O6	203746		471.331	C26H47O7	19308.9
363.203	C17H31O8	29217.6		471.346	C30H47O4	24001
365.051	C16H13O10	31131.4		473.274	C24H41O9	24253.6
365.073	C13H17O12	29466.8		473.288	C28H41O6	75539.1
365.088	C17H17O9	10063.1		473.326	C29H45O5	14411.2
365.109	C14H21O11	130849		473.362	C30H49O4	513502
365.124	C18H21O8	9452.42		475.268	C27H39O7	155565
365.146	C15H25O10	220508		475.304	C28H43O6	172851
365.161	C19H25O7	9025.62		475.341	C29H47O5	262476
365.182	C16H29O9	37759.1		477.284	C27H41O7	283715
365.197	C20H29O6	494527		477.32	C28H45O6	49317.4
367.031	C15H11O11	10178.5		477.357	C29H49O5	11006
367.067	C16H15O10	57403		479.279	C30H39O5	11018.7
367.088	C13H19O12	9255.56		479.3	C27H43O7	250120
367.104	C17H19O9	10690.1		479.336	C28H47O6	11612.4
367.125	C14H23O11	77584.7		481.019	C26H9O10	9118.09
367.14	C18H23O8	366821		481.279	C26H41O8	78093.1
367.161	C15H27O10	44738.6		481.315	C27H45O7	25528.5
367.177	C19H27O7	23730.1		481.351	C28H49O6	17386.9
367.213	C20H31O6	14191.1		483.294	C26H43O8	47703.3
368.989	C17H5O10	9776.43		483.309	C30H43O5	56955.1
369.047	C15H13O11	22283.6		483.331	C27H47O7	40014.3
369.062	C19H13O8	14368.5		485.274	C25H41O9	9251.2
369.083	C16H17O10	113132		485.311	C26H45O8	139423
369.104	C13H21O12	9441.29		485.325	C30H45O5	518276
369.119	C17H21O9	15083.1		487.253	C24H39O10	19882
369.14	C14H25O11	27077.9		487.29	C25H43O9	18297
369.156	C18H25O8	27741.2		487.304	C29H43O6	232232
369.192	C19H29O7	27325		487.325	C26H47O8	61510.3
369.228	C20H33O6	461366		487.341	C30H47O5	1165680
371.041	C18H11O9	16372.7		489.283	C28H41O7	91300
371.062	C15H15O11	22258.5		489.305	C25H45O9	14295.7
371.078	C19H15O8	19550.3		489.32	C29H45O6	683985
371.099	C16H19O10	11787.4		489.357	C30H49O5	2474500
371.114	C20H19O7	26777.9		491.299	C28H43O7	212774
371.135	C17H23O9	24545.3		491.336	C29H47O6	660441
371.171	C18H27O8	22696.7		491.372	C30H51O5	35946.1
371.208	C19H31O7	433071		493.278	C27H41O8	191403
371.244	C20H35O6	234280		493.315	C28H45O7	150504
373.057	C18H13O9	11004.6		493.352	C29H49O6	64143.9
373.063	C11H17O14	19601.4		495.257	C26H39O9	36245.8
373.078	C15H17O11	24902.9		495.294	C27H43O8	119977
373.093	C19H17O8	85490.7		495.33	C28H47O7	28548.1
373.114	C16H21O10	302861		497.31	C27H45O8	17182.2
373.13	C20H21O7	40285.7		497.346	C28H49O7	87578.9
373.151	C17H25O9	28355.7		499.289	C26H43O9	18262.2
373.166	C21H25O6	9903.49		499.325	C27H47O8	64226.7
373.187	C18H29O8	456230		501.269	C25H41O10	26931.7
373.223	C19H33O7	109426		501.306	C26H45O9	91558.2
373.26	C20H37O6	20051.1		501.32	C30H45O6	425711
375.036	C17H11O10	9823.68		503.299	C29H43O7	229778
375.058	C14H15O12	9474.44		503.336	C30H47O6	1141340
375.072	C18H15O9	50655.3		505.3	C25H45O10	80436.1
375.094	C15H19O11	96799.6		505.315	C29H45O7	579682
375.109	C19H19O8	113802		505.351	C30H49O6	1309720
375.13	C16H23O10	465900		507.294	C28H43O8	101553
375.145	C20H23O7	64474.2		507.331	C29H47O7	553559
375.166	C17H27O9	659104		507.367	C30H51O6	435528
375.182	C21H27O6	11208.6		509.31	C28H45O8	125373
375.203	C18H31O8	105922		509.346	C29H49O7	117516
375.239	C19H35O7	12936.5		509.383	C30H53O6	12519.8
377.052	C17H13O10	25629.5		511.289	C27H43O9	52519
377.073	C14H17O12	26352.6		511.325	C28H47O8	127717
377.088	C18H17O9	98616.5		511.362	C29H51O7	17644.7
377.109	C15H21O11	168230		513.377	C29H53O7	16706.9
377.125	C19H21O8	9498.29		515.32	C27H47O9	10100.3
377.146	C16H25O10	437024		517.299	C26H45O10	33379.1
377.161	C20H25O7	153394		517.315	C30H45O7	242318
377.182	C17H29O9	166134		519.135	C21H27O15	26599
377.197	C21H29O6	19229.8		519.279	C25H43O11	51238.2
377.218	C18H33O8	26183.4		519.315	C26H47O10	60105.4
379.031	C16H11O11	11603.7		519.33	C30H47O7	694971
379.067	C17H15O10	45138.3		521.296	C25H45O11	29149.3
379.088	C14H19O12	12691.5		521.31	C29H45O8	303942
379.104	C18H19O9	114408		521.346	C30H49O7	892265
379.125	C15H23O11	168600		523.325	C29H47O8	314577
379.14	C19H23O8	215671		523.362	C30H51O7	593348
379.161	C16H27O10	141884		525.341	C29H49O8	41926.5
379.176	C20H27O7	330037		525.378	C30H53O7	11696.9
379.198	C17H31O9	31121.4		527.32	C28H47O9	16038.6
379.213	C21H31O6	15797.5		527.356	C29H51O8	75224.9
381.047	C16H13O11	26083.3		533.149	C22H29O15	49893
381.083	C17H17O10	66775.9		533.294	C26H45O11	84439
381.104	C14H21O12	26397.4		535.146	C25H27O13	65982.3
381.119	C18H21O9	198238		535.274	C25H43O12	11188.6
381.141	C15H25O11	60709.3		535.311	C26H47O11	24111.4
381.156	C19H25O8	18878.6		535.325	C30H47O8	252257
381.177	C16H29O10	21534.2		535.346	C27H51O10	17956.3
381.192	C20H29O7	21523.8		537.304	C29H45O9	222868
381.229	C21H33O6	25752.7		537.341	C30H49O8	299348
383.062	C16H15O11	22412.8		539.32	C29H47O9	43302.2
383.078	C20H15O8	19584.5		539.357	C30H51O8	89245.4
383.099	C17H19O10	131406		541.336	C29H49O9	25073.8
383.12	C14H23O12	29258.6		543.351	C29H51O9	28569.5
383.135	C18H23O9	302360		549.29	C26H45O12	33289.1
383.156	C15H27O11	11446		551.32	C30H47O9	207972
383.171	C19H27O8	53531.2		553.336	C30H49O9	64636
383.208	C20H31O7	24844.3		555.351	C30H51O9	13553.3
383.244	C21H35O6	35378.7		557.33	C29H49O10	15926.7
385.057	C19H13O9	18171		559.346	C29H51O10	24557.3
385.078	C16H17O11	35345.8		561.325	C28H49O11	23222.9
385.094	C20H17O8	41515.4		561.362	C29H53O10	33611.8
385.114	C17H21O10	9151.34		567.315	C30H47O10	38519.9
385.13	C21H21O7	23205.4		569.33	C30H49O10	79556.5
385.151	C18H25O9	30715.5		571.347	C30H51O10	21586.3
385.187	C19H29O8	30165.6		575.305	C28H47O12	9631.9
385.224	C20H33O7	636642		577.321	C28H49O12	9448.35
385.26	C21H37O6	10155.9		587.341	C30H51O11	14600.5
387.036	C18H11O10	10365.9
387.058	C15H15O12	9564.67
387.073	C19H15O9	21362.8
387.093	C16H19O11	13079.5
387.109	C20H19O8	77300.9
387.13	C17H23O10	12774.4
387.145	C21H23O7	10240.8
387.166	C18H27O9	26651.4
387.203	C19H31O8	9447.21
387.239	C20H35O7	171151
389.052	C18H13O10	33018.7
389.073	C15H17O12	22575.5
389.088	C19H17O9	77871.1
389.109	C16H21O11	155791
389.125	C20H21O8	73499.2
389.146	C17H25O10	28667.1
389.161	C21H25O7	9804.18
389.182	C18H29O9	469310
389.218	C19H33O8	83643.3
389.255	C20H37O7	32132.8
391.031	C17H11O11	12464.9
391.067	C18H15O10	43538.8
391.089	C15H19O12	15589.6
391.104	C19H19O9	130157
391.125	C16H23O11	9775.18
391.14	C20H23O8	88240.8
391.162	C17H27O10	492961
391.176	C21H27O7	10110
391.198	C18H31O9	112177
391.234	C19H35O8	29216.3
393.047	C17H13O11	24546.7
393.083	C18H17O10	69881.6
393.104	C15H21O12	42815.4
393.12	C19H21O9	116632
393.141	C16H25O11	193279
393.156	C20H25O8	155839
393.177	C17H29O10	101958
393.192	C21H29O7	14504.9
393.214	C18H33O9	23092.6
395.062	C17H15O11	20664.8
395.098	C18H19O10	92782.7
395.12	C15H23O12	28765.1
395.135	C19H23O9	9616.92
395.156	C16H27O11	46678.6
395.171	C20H27O8	382639
395.192	C17H31O10	19199.8
395.208	C21H31O7	55365.9
397.078	C17H17O11	27706
397.094	C21H17O8	19871.6
397.114	C18H21O10	113393
397.136	C15H25O12	29526.9
397.15	C19H25O9	14328.9
397.187	C20H29O8	29868.6
397.224	C21H33O7	64929
397.26	C22H37O6	12473.3
399.058	C16H15O12	9938.39
399.073	C20H15O9	25673.8
399.093	C17H19O11	54904.5
399.109	C21H19O8	23181.5
399.13	C18H23O10	210572
399.146	C22H23O7	15302.6
399.166	C19H27O9	31712
399.203	C20H31O8	28816
399.239	C21H35O7	34214.2
401.052	C19H13O10	15923.3
401.073	C16H17O12	26574.8
401.088	C20H17O9	54944.4
401.109	C17H21O11	110247
401.125	C21H21O8	28669.2
401.145	C18H25O10	12692.9
401.161	C22H25O7	16186
401.182	C19H29O9	33914
401.219	C20H33O8	564889
401.255	C21H37O7	9778.55
403.068	C19H15O10	33462.5
403.088	C16H19O12	14669.4
403.104	C20H19O9	75885.6
403.125	C17H23O11	227867
403.14	C21H23O8	24665.1
403.161	C18H27O10	20215.6
403.176	C22H27O7	12243.4
403.198	C19H31O9	445078
403.234	C20H35O8	109495
405.047	C18H13O11	19232.5
405.083	C19H17O10	52753.1
405.104	C16H21O12	30308.8
405.119	C20H21O9	66666.5
405.141	C17H25O11	17112.1
405.156	C21H25O8	14920.6
405.177	C18H29O10	332603
405.192	C22H29O7	18106.4
405.213	C19H33O9	44989
405.25	C20H37O8	21186.5
407.062	C18H15O11	10659.6
407.084	C15H19O13	13885.3
407.099	C19H19O10	64127
407.12	C16H23O12	162698
407.135	C20H23O9	73005.5
407.156	C17H27O11	232094
407.171	C21H27O8	20885.6
407.193	C18H31O10	59483.2
407.202	C29H27O2	21449.7
407.208	C22H31O7	18635.1
407.229	C19H35O9	26354.6
409.078	C18H17O11	16894.1
409.1	C15H21O13	23828.5
409.114	C19H21O10	88744.7
409.136	C16H25O12	64880.5
409.151	C20H25O9	139133
409.172	C17H29O11	42472.1
409.187	C21H29O8	69050
409.208	C18H33O10	14894.4
409.224	C22H33O7	35159.7
411.058	C17H15O12	14010.6
411.073	C21H15O9	9466.18
411.094	C18H19O11	37202
411.116	C15H23O13	13661.4
411.13	C19H23O10	122615
411.152	C16H27O12	16090.3
411.167	C20H27O9	13646
411.186	C17H31O11	16571.2
411.203	C21H31O8	128068
411.239	C22H35O7	9313.36
413.073	C17H17O12	21449.4
413.089	C21H17O9	13124.6
413.109	C18H21O11	44911
413.125	C22H21O8	29061.1
413.146	C19H25O10	275322
413.182	C20H29O9	30587.2
413.202	C17H33O11	21484.1
413.219	C21H33O8	144242
413.255	C22H37O7	14585.1
415.068	C20H15O10	27300.6
415.089	C17H19O12	11408.8
415.104	C21H19O9	36104.3
415.125	C18H23O11	125064
415.141	C22H23O8	13968.7
415.162	C19H27O10	26043.2
415.198	C20H31O9	26953.8
415.217	C17H35O11	27291.3
415.234	C21H35O8	60498.2
417.083	C20H17O10	30216.4
417.105	C17H21O12	36804.4
417.12	C21H21O9	46029.8
417.141	C18H25O11	245616
417.156	C22H25O8	12973.1
417.177	C19H29O10	20541.9
417.197	C16H33O12	17990.4
417.214	C20H33O9	455935
417.25	C21H37O8	23229.3
419.063	C19H15O11	27524.6
419.084	C16H19O13	14747.8
419.099	C20H19O10	60664.3
419.12	C17H23O12	97271.2
419.135	C21H23O9	26600.4
419.156	C18H27O11	14281.8
419.172	C22H27O8	33698.9
419.193	C19H31O10	312982
419.229	C20H35O9	65309.2
421.078	C19H17O11	11516
421.1	C16H21O13	33849.7
421.115	C20H21O10	43753.2
421.136	C17H25O12	210369
421.151	C21H25O9	24576.7
421.172	C18H29O11	204294
421.188	C22H29O8	43706.3
421.209	C19H33O10	37229.1
421.245	C20H37O9	18450.7
423.058	C18H15O12	11640.7
423.094	C19H19O11	23098.7
423.115	C16H23O13	13987.6
423.13	C20H23O10	72840.3
423.151	C17H27O12	79705.3
423.166	C21H27O9	33382.7
423.187	C18H31O11	22424.2
423.203	C22H31O8	26935.8
423.224	C19H35O10	15248.5
423.24	C23H35O7	18968.1
425.074	C18H17O12	22260.9
425.11	C19H21O11	42262.2
425.125	C23H21O8	11291.2
425.131	C16H25O13	22238.3
425.146	C20H25O10	109452
425.167	C17H29O12	22078.8
425.182	C21H29O9	93199.7
425.202	C18H33O11	9575.45
425.218	C22H33O8	26392.9
427.068	C21H15O10	10835.8
427.089	C18H19O12	33223
427.105	C22H19O9	9180.74
427.125	C19H23O11	79182.2
427.141	C23H23O8	17840.4
427.161	C20H27O10	9884.71
427.181	C17H31O12	11391.9
427.198	C21H31O9	180855
427.234	C22H35O8	21624.4
429.084	C21H17O10	35682.9
429.104	C18H21O12	10883.8
429.12	C22H21O9	23896.9
429.141	C19H25O11	194800
429.157	C23H25O8	22468.1
429.177	C20H29O10	31682.1
429.197	C17H33O12	24508.1
429.213	C21H33O9	183891
429.25	C22H37O8	25144.7
431.063	C20H15O11	19137.4
431.084	C17H19O13	13043.5
431.099	C21H19O10	23220.7
431.12	C18H23O12	57033.2
431.135	C22H23O9	17335.9
431.156	C19H27O11	21828.1
431.172	C23H27O8	14786.2
431.193	C20H31O10	21220.6
431.212	C17H35O12	44198.7
431.229	C21H35O9	72574.8
433.078	C20H17O11	17633
433.114	C21H21O10	27929.7
433.135	C18H25O12	131837
433.151	C22H25O9	14878.9
433.172	C19H29O11	13646
433.187	C23H29O8	19670.7
433.191	C16H33O13	13591.4
433.209	C20H33O10	314058
433.228	C17H37O12	9166.44
433.245	C21H37O9	25931.8
435.058	C19H15O12	9697.5
435.094	C20H19O11	21223.2
435.115	C17H23O13	19152.1
435.13	C21H23O10	40666.5
435.151	C18H27O12	10082.8
435.166	C22H27O9	18359.1
435.188	C19H31O11	177285
435.203	C23H31O8	33363.7
435.224	C20H35O10	39361
435.24	C24H35O7	9088.5
437.074	C19H17O12	23483.5
437.109	C20H21O11	18681.9
437.131	C17H25O13	40789.6
437.146	C21H25O10	34006.5
437.167	C18H29O12	75244.8
437.182	C22H29O9	24161
437.203	C19H33O11	19931.8
437.218	C23H33O8	10243
437.24	C20H37O10	12158.2
437.255	C24H37O7	12262.8
439.089	C19H19O12	11158.2
439.125	C20H23O11	35893.4
439.147	C17H27O13	34291.3
439.161	C21H27O10	59470.4
439.183	C18H31O12	21915.3
439.198	C22H31O9	59077.6
439.234	C23H35O8	12665.3
441.084	C22H17O10	12902.5
441.104	C19H21O12	11608.4
441.12	C23H21O9	13813.6
441.141	C20H25O11	52029.9
441.177	C21H29O10	98644
441.214	C22H33O9	65641.2
441.251	C23H37O8	25935.1
443.084	C18H19O13	9902.76
443.099	C22H19O10	18018.3
443.12	C19H23O12	33149.7
443.135	C23H23O9	11883.1
443.156	C20H27O11	241327
443.193	C21H31O10	186189
443.229	C22H35O9	45055.2
445.079	C21H17O11	23114.4
445.1	C18H21O13	21746.4
445.115	C22H21O10	22999.3
445.136	C19H25O12	87194.4
445.151	C23H25O9	18078.2
445.172	C20H29O11	28563.1
445.192	C17H33O13	23791.1
445.208	C21H33O10	218938
445.244	C22H37O9	12763.9
447.094	C21H19O11	9593.51
447.115	C18H23O13	11952.6
447.13	C22H23O10	32179.3
447.151	C19H27O12	20358.7
447.167	C23H27O9	34395.7
447.188	C20H31O11	9150.68
447.207	C17H35O13	27205.7
447.224	C21H35O10	80120
447.261	C22H39O9	15782.5
449.074	C20H17O12	20223
449.109	C21H21O11	24331.2
449.13	C18H25O13	42658.6
449.146	C22H25O10	29710.2
449.167	C19H29O12	292683
449.183	C23H29O9	17162.3
449.203	C20H33O11	214278
449.219	C24H33O8	16444.5
449.24	C21H37O10	21657
451.089	C20H19O12	9402.97
451.111	C17H23O14	16426.2
451.125	C21H23O11	23061.3
451.146	C18H27O13	52439.9
451.161	C22H27O10	21793.6
451.183	C19H31O12	103423
451.198	C23H31O9	21671.3
451.22	C20H35O11	39670.7
451.235	C24H35O8	31108.5
453.105	C20H21O12	35437.8
453.126	C17H25O14	27540.5
453.14	C21H25O11	22301.7
453.162	C18H29O13	19847.1
453.177	C22H29O10	27163
453.199	C19H33O12	16195.8
453.214	C23H33O9	34880.8
453.25	C24H37O8	32116.2
455.084	C19H19O13	9467.31
455.1	C23H19O10	18236.6
455.12	C20H23O12	16451.2
455.136	C24H23O9	21421
455.156	C21H27O11	39909.1
455.193	C22H31O10	75353
455.229	C23H35O9	34277.4
455.266	C24H39O8	24855.1
457.079	C22H17O11	9210.04
457.1	C19H21O13	18448.6
457.115	C23H21O10	16195.3
457.136	C20H25O12	22091.1
457.152	C24H25O9	30204.5
457.172	C21H29O11	59838.1
457.209	C22H33O10	84004.7
457.245	C23H37O9	25001.5
459.095	C22H19O11	28117.1
459.116	C19H23O13	34285.4
459.13	C23H23O10	21801.2
459.151	C20H27O12	114895
459.167	C24H27O9	24642.4
459.188	C21H31O11	156271
459.204	C25H31O8	9125.83
459.224	C22H35O10	88929.9
459.261	C23H39O9	17634.3
461.074	C21H17O12	13710.2
461.109	C22H21O11	22111.7
461.131	C19H25O13	26309.4
461.146	C23H25O10	18716.6
461.167	C20H29O12	19564
461.203	C21H33O11	221651
461.24	C22H37O10	25135.9
463.089	C21H19O12	24308.3
463.125	C22H23O11	14166.1
463.146	C19H27O13	16150.1
463.162	C23H27O10	11427.5
463.183	C20H31O12	327844
463.199	C24H31O9	10564.6
463.219	C21H35O11	44696.3
463.235	C25H35O8	15139
463.256	C22H39O10	12144.9
465.104	C21H21O12	12345.6
465.126	C18H25O14	35434.7
465.141	C22H25O11	26835.4
465.162	C19H29O13	163008
465.177	C23H29O10	12402.7
465.198	C20H33O12	87009.8
465.214	C24H33O9	43592.2
465.235	C21H37O11	14581.6
465.25	C25H37O8	19198.3
467.12	C21H23O12	38077.7
467.141	C18H27O14	14811.9
467.156	C22H27O11	19334.1
467.178	C19H31O13	11951.9
467.193	C23H31O10	31085.2
467.214	C20H35O12	22590
467.229	C24H35O9	30940.2
467.266	C25H39O8	15924
469.1	C20H21O13	18962.9
469.115	C24H21O10	18069.3
469.136	C21H25O12	48877.4
469.151	C25H25O9	12611.5
469.172	C22H29O11	28348.9
469.208	C23H33O10	69758.5
469.245	C24H37O9	23136.7
471.094	C23H19O11	16206.6
471.115	C20H23O13	26466.6
471.13	C24H23O10	13978.7
471.151	C21H27O12	12101.4
471.167	C25H27O9	21339.8
471.187	C22H31O11	57089.1
471.224	C23H35O10	101500
471.261	C24H39O9	37853.3
473.11	C23H21O11	30586.6
473.131	C20H25O13	42327.6
473.146	C24H25O10	38222.3
473.167	C21H29O12	42385.3
473.183	C25H29O9	18845
473.203	C22H33O11	92485.5
473.24	C23H37O10	48500.6
473.277	C24H41O9	13613
475.089	C22H19O12	16622.5
475.125	C23H23O11	13508.5
475.146	C20H27O13	42609.8
475.161	C24H27O10	12994.2
475.182	C21H31O12	136390
475.198	C25H31O9	19919.2
475.219	C22H35O11	66655.1
475.235	C26H35O8	12354.1
475.256	C23H39O10	34929.7
477.105	C22H21O12	27171.6
477.126	C19H25O14	22773.2
477.14	C23H25O11	23003.6
477.162	C20H29O13	292603
477.177	C24H29O10	9902.35
477.198	C21H33O12	165274
477.214	C25H33O9	32736.8
477.234	C22H37O11	12999.8
477.25	C26H37O8	13676.3
479.12	C22H23O12	9788.49
479.141	C19H27O14	133331
479.156	C23H27O11	15330.1
479.178	C20H31O13	146356
479.194	C24H31O10	9836.22
479.214	C21H35O12	32491.4
479.23	C25H35O9	40499.9
479.25	C22H39O11	12134.6
479.266	C26H39O8	15564.3
481.1	C21H21O13	14109
481.136	C22H25O12	41498.3
481.157	C19H29O14	52747.8
481.172	C23H29O11	19591.5
481.193	C20H33O13	50163.9
481.208	C24H33O10	38259.5
481.229	C21H37O12	9950.71
481.245	C25H37O9	44562.2
483.116	C21H23O13	20858.1
483.131	C25H23O10	9211.78
483.137	C18H27O15	11890.7
483.151	C22H27O12	21962.9
483.173	C19H31O14	13691.7
483.188	C23H31O11	33090.5
483.224	C24H35O10	45498.9
483.261	C25H39O9	39741
485.11	C24H21O11	18562.4
485.131	C21H25O13	29998.6
485.146	C25H25O10	11471.4
485.167	C22H29O12	15467.1
485.183	C26H29O9	13987.7
485.203	C23H33O11	72943.7
485.24	C24H37O10	41067.4
485.277	C25H41O9	10752.2
487.089	C23H19O12	9335.8
487.111	C20H23O14	9186.14
487.125	C24H23O11	9240.07
487.147	C21H27O13	39888.9
487.162	C25H27O10	29632.6
487.183	C22H31O12	51927.6
487.198	C26H31O9	13703.4
487.219	C23H35O11	101267
487.255	C24H39O10	20688.4
489.105	C23H21O12	21823
489.126	C20H25O14	13316.4
489.141	C24H25O11	17324.3
489.162	C21H29O13	17759.4
489.178	C25H29O10	30396.9
489.198	C22H33O12	80181.4
489.214	C26H33O9	22535
489.234	C23H37O11	29102.4
489.25	C27H37O8	9962.24
489.271	C24H41O10	14998.1
491.12	C23H23O12	9179.19
491.142	C20H27O14	36155.2
491.157	C24H27O11	14047.7
491.177	C21H31O13	91510.9
491.193	C25H31O10	36056.7
491.214	C22H35O12	65798.2
491.23	C26H35O9	33194.5
491.251	C23H39O11	30237.7
491.266	C27H39O8	12229
493.1	C22H21O13	14302.1
493.136	C23H25O12	36822.6
493.157	C20H29O14	123816
493.172	C24H29O11	10601.8
493.193	C21H33O13	157143
493.209	C25H33O10	49201.8
493.23	C22H37O12	36095.9
493.245	C26H37O9	37897.4
493.282	C27H41O8	18977.1
495.115	C22H23O13	19091.5
495.137	C19H27O15	29859.7
495.151	C23H27O12	9405.69
495.172	C20H31O14	80754.6
495.188	C24H31O11	14946
495.209	C21H35O13	38441.9
495.224	C25H35O10	24141.2
495.245	C22H39O12	10104.4
495.26	C26H39O9	9315.07
497.131	C22H25O13	26069.3
497.153	C19H29O15	22013.1
497.167	C23H29O12	15042.9
497.189	C20H33O14	23344.5
497.203	C24H33O11	24458.6
497.24	C25H37O10	28971
497.259	C22H41O12	10730.2
497.277	C26H41O9	27450.9
499.126	C25H23O11	20021
499.147	C22H27O13	31176.8
499.162	C26H27O10	19563.8
499.183	C23H31O12	23360.7
499.219	C24H35O11	58063.9
499.255	C25H39O10	27369.3
501.105	C24H21O12	14759.1
501.126	C21H25O14	11912.3
501.141	C25H25O11	13075
501.162	C22H29O13	10741.8
501.178	C26H29O10	23683.6
501.198	C23H33O12	50955.4
501.214	C27H33O9	9374.48
501.235	C24H37O11	58244.1
501.272	C25H41O10	35503.6
503.121	C24H23O12	24738.6
503.142	C21H27O14	19142.2
503.157	C25H27O11	32334.2
503.178	C22H31O13	23015.5
503.193	C26H31O10	25157.2
503.214	C23H35O12	79092.8
503.23	C27H35O9	18067.3
503.25	C24H39O11	26967.6
505.136	C24H25O12	31366.7
505.158	C21H29O14	32657.8
505.173	C25H29O11	38996.8
505.193	C22H33O13	67333.2
505.208	C26H33O10	9077.36
505.229	C23H37O12	19163.8
505.246	C27H37O9	27521
505.266	C24H41O11	18360
507.136	C20H27O15	9575.04
507.151	C24H27O12	34432.1
507.172	C21H31O14	61466.4
507.188	C25H31O11	42451.3
507.208	C22H35O13	32770.3
507.223	C26H35O10	19453.2
507.245	C23H39O12	28397.8
507.261	C27H39O9	40128.4
509.131	C23H25O13	19572.5
509.151	C20H29O15	28674.2
509.167	C24H29O12	38686.5
509.187	C21H33O14	45583.1
509.203	C25H33O11	15586.7
509.224	C22H37O13	23430.1
509.239	C26H37O10	27241.9
509.259	C23H41O12	9706.83
509.276	C27H41O9	34921.6
511.146	C23H27O13	23344.3
511.168	C20H31O15	35704.1
511.183	C24H31O12	16316.8
511.204	C21H35O14	15022.8
511.218	C25H35O11	42241.3
511.255	C26H39O10	32623.1
511.292	C27H43O9	17542.7
513.126	C22H25O14	9794.43
513.141	C26H25O11	18435.2
513.162	C23H29O13	36062.3
513.177	C27H29O10	10850.4
513.198	C24H33O12	31168.9
513.234	C25H37O11	48822.1
513.271	C26H41O10	11518
515.12	C25H23O12	13659.9
515.141	C22H27O14	16730.8
515.157	C26H27O11	26298.7
515.177	C23H31O13	9908.32
515.193	C27H31O10	16715.4
515.213	C24H35O12	62282.8
515.25	C25H39O11	38133.4
515.287	C26H43O10	30427.7
517.136	C25H25O12	22797.5
517.157	C22H29O14	21825.2
517.172	C26H29O11	10761.7
517.193	C23H33O13	33592.5
517.209	C27H33O10	21513.3
517.229	C24H37O12	58232.6
517.265	C25H41O11	12321.6
519.115	C24H23O13	11655.5
519.151	C25H27O12	29089.8
519.173	C22H31O14	42331.6
519.187	C26H31O11	10151.3
519.208	C23H35O13	44920
519.224	C27H35O10	34047
519.245	C24H39O12	18446.4
519.261	C28H39O9	11912.6
521.131	C24H25O13	14505.4
521.152	C21H29O15	9865.45
521.167	C25H29O12	32184.2
521.187	C22H33O14	26721.1
521.202	C26H33O11	11084.3
521.223	C23H37O13	10360.4
521.24	C27H37O10	42459.6
521.261	C24H41O12	12796.4
521.276	C28H41O9	13039.3
523.146	C24H27O13	22007.1
523.168	C21H31O15	51774.7
523.183	C25H31O12	39121.5
523.204	C22H35O14	9494.55
523.218	C26H35O11	16784.8
523.24	C23H39O13	14984.9
523.255	C27H39O10	15983.7
523.292	C28H43O9	13908.9
525.162	C24H29O13	26604.8
525.182	C21H33O15	19687.3
525.198	C25H33O12	12021.2
525.234	C26H37O11	38147.9
525.271	C27H41O10	24109.9
527.141	C23H27O14	12552.7
527.157	C27H27O11	11837
527.178	C24H31O13	38098
527.213	C25H35O12	36497.9
527.25	C26H39O11	27641.1
527.287	C27H43O10	36506.7
529.136	C26H25O12	16452.6
529.157	C23H29O14	21094
529.172	C27H29O11	9613.07
529.193	C24H33O13	15580.6
529.209	C28H33O10	9203.73
529.229	C25H37O12	43832.4
529.266	C26H41O11	25407.9
529.303	C27H45O10	9507.9
531.151	C26H27O12	9088.75
531.173	C23H31O14	30518
531.188	C27H31O11	21778.8
531.208	C24H35O13	38875.4
531.225	C28H35O10	15024.7
531.245	C25H39O12	42726.8
531.282	C26H43O11	21574
533.131	C25H25O13	14156.1
533.167	C26H29O12	27049.1
533.188	C23H33O14	13867.3
533.204	C27H33O11	24138.8
533.224	C24H37O13	45866.2
533.24	C28H37O10	17833.5
533.261	C25H41O12	31029.5
535.146	C25H27O13	16379.8
535.168	C22H31O15	24007.2
535.182	C26H31O12	10476.6
535.203	C23H35O14	38153.5
535.219	C27H35O11	13530.1
535.24	C24H39O13	9579.17
535.256	C28H39O10	25807.3
535.292	C29H43O9	17394.9
537.162	C25H29O13	22608.2
537.183	C22H33O15	16115.6
537.197	C26H33O12	9716.79
537.22	C23H37O14	36026.4
537.234	C27H37O11	16618.1
537.255	C24H41O13	10735.5
537.271	C28H41O10	31481.2
537.308	C29H45O9	14046
539.141	C24H27O14	10072.7
539.178	C25H31O13	30613.9
539.199	C22H35O15	24257.5
539.213	C26H35O12	17181.8
539.25	C27H39O11	45083.1
539.287	C28H43O10	31990.8
541.158	C24H29O14	16504
541.193	C25H33O13	42277.7
541.229	C26H37O12	43510.6
541.265	C27H41O11	35101.6
541.303	C28H45O10	18741.2
543.152	C27H27O12	14470.4
543.173	C24H31O14	23336.5
543.188	C28H31O11	12331.4
543.208	C25H35O13	21998.3
543.245	C26H39O12	55249
543.281	C27H43O11	11912.9
545.167	C27H29O12	19612.1
545.188	C24H33O14	9503.68
545.204	C28H33O11	13880.9
545.224	C25H37O13	36385.8
545.241	C29H37O10	9961.82
545.26	C26H41O12	16959.7
545.298	C27H45O11	11276.2
547.147	C26H27O13	13492.4
547.168	C23H31O15	12857
547.183	C27H31O12	22061.9
547.203	C24H35O14	30424.1
547.219	C28H35O11	18752.9
547.239	C25H39O13	32380.6
547.256	C29H39O10	15357.5
547.277	C26H43O12	19280.8
549.162	C26H29O13	19596.8
549.184	C23H33O15	49186.6
549.199	C27H33O12	25416.3
549.219	C24H37O14	30638.1
549.235	C28H37O11	24616
549.256	C25H41O13	27244.7
549.272	C29H41O10	24783.6
551.178	C26H31O13	22805.2
551.198	C23H35O15	14756
551.214	C27H35O12	37250.6
551.235	C24H39O14	33394.7
551.251	C28H39O11	36432.3
551.286	C29H43O10	10812.1
551.324	C30H47O9	11884.2
553.157	C25H29O14	13485.7
553.194	C26H33O13	32819.3
553.215	C23H37O15	19786
553.229	C27H37O12	13170.2
553.266	C28H41O11	9538.55
553.303	C29H45O10	32333.9
555.173	C25H31O14	17054.8
555.209	C26H35O13	45529.2
555.245	C27H39O12	28368
555.281	C28H43O11	10750.7
555.318	C29H47O10	14482.6
557.167	C28H29O12	11271.4
557.189	C25H33O14	27867.4
557.224	C26H37O13	25079.6
557.26	C27H41O12	36643
557.297	C28H45O11	28119.3
559.146	C27H27O13	9467.99
559.168	C24H31O15	10037.8
559.183	C28H31O12	15141.9
559.203	C25H35O14	15872.8
559.219	C29H35O11	11139.9
559.24	C26H39O13	35875.6
559.276	C27H43O12	14059.2
561.162	C27H29O13	13745.6
561.183	C24H33O15	23253.8
561.199	C28H33O12	14743.5
561.219	C25H37O14	20624.4
561.235	C29H37O11	20063.4
561.256	C26H41O13	54082.7
561.292	C27H45O12	9368.51
563.178	C27H31O13	14226.4
563.198	C24H35O15	14898.9
563.214	C28H35O12	17558.8
563.234	C25H39O14	17742.3
563.251	C29H39O11	18611
563.271	C26H43O13	12604.7
563.287	C30H43O10	13563.2
565.193	C27H33O13	20108
565.213	C24H37O15	9889.94
565.23	C28H37O12	27109.1
565.251	C25H41O14	15324.9
565.266	C29H41O11	33671.2
565.303	C30H45O10	24116.2
567.173	C26H31O14	10145.9
567.209	C27H35O13	28961.8
567.23	C24H39O15	14551.4
567.245	C28H39O12	11233.2
567.281	C29H43O11	14994
567.318	C30H47O10	28000.9
569.188	C26H33O14	19746.9
569.224	C27H37O13	12253.1
569.26	C28H41O12	12564.6
569.298	C29H45O11	43880.4
569.334	C30H49O10	12490.1
571.205	C26H35O14	33592.8
571.239	C27H39O13	16147.6
571.276	C28H43O12	15106.2
571.313	C29H47O11	19638.5
573.162	C28H29O13	10026.2
573.183	C25H33O15	14999.8
573.199	C29H33O12	9151.63
573.219	C26H37O14	11620.1
573.255	C27H41O13	36613.6
573.292	C28H45O12	27483.4
575.178	C28H31O13	13789
575.199	C25H35O15	33938.8
575.214	C29H35O12	13667.1
575.235	C26H39O14	22021.9
575.251	C30H39O11	10612.5
575.272	C27H43O13	39019.5
577.194	C28H33O13	12444.2
577.214	C25H37O15	16475.6
577.23	C29H37O12	18717.5
577.25	C26H41O14	12150.8
577.267	C30H41O11	14613.8
579.173	C27H31O14	9625.04
579.209	C28H35O13	17646
579.23	C25H39O15	32999.4
579.246	C29H39O12	22786.1
579.282	C30H43O11	19532.5
581.189	C27H33O14	15357
581.225	C28H37O13	22101
581.261	C29H41O12	35581.5
581.298	C30H45O11	31657
583.204	C27H35O14	22556.4
583.241	C28H39O13	35732.3
583.276	C29H43O12	21317
583.313	C30H47O11	32129.3
585.184	C26H33O15	9961.79
585.219	C27H37O14	9634.83
585.255	C28H41O13	19132.1
585.292	C29H45O12	12288.9
587.199	C26H35O15	20481.7
587.234	C27H39O14	12929.7
587.271	C28H43O13	16986.3
587.308	C29H47O12	18916.8
589.214	C26H37O15	12673.5
589.25	C27H41O14	23397.5
589.286	C28H45O13	11365.1
591.21	C29H35O13	13705.1
591.229	C26H39O15	16768.8
591.246	C30H39O12	10553.9
591.267	C27H43O14	29819.9
593.189	C28H33O14	9252.16
593.225	C29H37O13	13818.9
593.246	C26H41O15	29381.3
593.262	C30H41O12	15180.6
595.204	C28H35O14	11981.1
595.241	C29H39O13	21179.4
595.277	C30H43O12	21267.4
597.22	C28H37O14	18431.6
597.256	C29H41O13	32082
597.293	C30H45O12	32504.1
599.199	C27H35O15	12903.3
599.236	C28H39O14	29041.9
599.271	C29H43O13	9344.06
599.308	C30H47O12	34912.6
601.215	C27H37O15	21952.2
601.25	C28H41O14	17401.7
601.286	C29H45O13	18417.4
603.23	C27H39O15	10992
603.266	C28H43O14	13515.1
603.303	C29H47O13	17528.4
605.225	C30H37O13	10276.1
605.246	C27H41O15	46441.3
605.282	C28H45O14	18949.5
607.205	C29H35O14	9876.69
607.241	C30H39O13	9396.54
607.262	C27H43O15	16884.3
609.22	C29H37O14	11205.8
609.256	C30H41O13	14871.9
611.235	C29H39O14	14602
611.272	C30H43O13	22502.6
613.215	C28H37O15	11399.2
613.251	C29H41O14	26170.4
613.287	C30H45O13	33221.9
615.23	C28H39O15	18910.4
615.266	C29H43O14	17229.3
615.303	C30H47O13	28079.4
617.246	C28H41O15	34006.4
617.281	C29H45O14	18111.1
619.262	C28H43O15	32225.9
619.298	C29H47O14	11393
621.277	C28H45O15	10012.3
625.251	C30H41O14	11689
627.23	C29H39O15	12207.6
627.267	C30H43O14	19816.5
629.246	C29H41O15	19392.9
629.282	C30H45O14	32344.5
631.262	C29H43O15	37726.5
631.298	C30H47O14	26368.3
633.277	C29H45O15	32867.4
643.262	C30H43O15	14279.4
645.277	C30H45O15	27415.2
647.293	C30H47O15	17467.9

## Sheet: 3)Common set limonene+4 studies
	78 chemical formulas
	C8H12O4
	C8H12O5
	C8H14O5
	C9H16O5
	C9H14O7
	C9H16O6
	C9H14O6
	C9H14O5
	C9H12O6
	C10H18O5
	C10H16O6
	C10H14O6
	C10H16O7
	C10H14O7
	C10H16O5
	C10H18O6
	C10H14O5
	C12H18O8
	C15H24O9
	C16H26O10
	C16H24O9
	C16H24O10
	C16H26O9
	C17H30O10
	C17H28O9
	C17H28O11
	C17H26O10
	C17H28O8
	C17H26O9
	C17H28O10
	C17H26O11
	C18H28O9
	C18H30O11
	C18H30O8
	C18H28O11
	C18H30O7
	C18H28O7
	C18H30O6
	C18H26O10
	C18H26O11
	C18H28O10
	C18H28O8
	C18H30O10
	C18H30O9
	C19H32O11
	C19H30O8
	C19H30O12
	C19H30O11
	C19H28O11
	C19H32O8
	C19H28O10
	C19H28O9
	C19H28O7
	C19H30O9
	C19H32O10
	C19H32O7
	C19H32O12
	C19H28O12
	C19H32O9
	C19H30O10
	C19H30O6
	C20H30O12
	C20H30O11
	C20H32O11
	C20H32O10
	C20H32O8
	C20H34O10
	C20H30O8
	C20H34O12
	C20H34O9
	C20H34O7
	C20H34O8
	C20H30O10
	C20H32O7
	C20H34O6
	C20H30O9
	C20H32O9
	C20H32O12

## Sheet: 4) JSR-FIA-HRMS data 
Chemical formulas identified in combustion with 10 carbon atoms	Chemical formulas linked by a difference of 2 oxygen atoms for C10H12-16O2-10
C10H12	C10H10O2
C10H8O	C10H10O3
C10H8O4	C10H10O4
C10H14O4	C10H10O5
C10H20O6	C10H10O6
C10H6O7	C10H10O7
C10H10O7	C10H10O8
C10H14O6	C10H10O9
C10H10O3	C10H12O2	even
C10H10O2	C10H12O3	odd
C10H20O4	C10H12O4
C10H8O3	C10H12O5
C10H16O6	C10H12O6
C10H18O5	C10H12O7
C10H10O5	C10H12O8
C10H12O5	C10H12O9
C10H14O5	C10H14O2
C10H14O2	C10H14O3
C10H20O2	C10H14O4
C10H20O5	C10H14O5
C10H12O4	C10H14O6
C10H8O7	C10H14O7
C10H8O6	C10H14O8
C10H6O6	C10H14O9
C10H20O7	C10H14O10
C10H8O5	C10H14O11
C10H12O2	C10H16O2
C10H14O	C10H16O3
C10H16O4	C10H16O4
C10H18O3	C10H16O5
C10H16O5	C10H16O6
C10H18O6	C10H16O7
C10H18O7	C10H16O8
C10H4O6	C10H16O9
C10H14O7	C10H16O10
C10H18O2	C10H18O11
C10H12O	C10H18O3
C10H18O4	C10H18O4
C10H10O4	C10H18O5
C10H12O7	C10H18O6
C10H12O6	C10H18O7
C10H10O6	C10H18O8
C10H10O	C10H18O9
C10H16O	C10H20O4
C10H14O3	C10H20O5
C10H6O4	C10H20O6
C10H16O7	C10H20O7
C10H18O	C10H20O8
C10H16O2	C10H4O8
C10H16	C10H4O9
C10H14	C10H6O6
C10H16O3	C10H6O7
C10H10	C10H6O8
C10H8O2	C10H8O3
C10H20O3	C10H8O4
C10H12O3	C10H8O5
C10H4O7	C10H8O6
C10H6O5	C10H8O7
C10H2O7	C10H8O8
C10H6O8
C10H12O8
C10H14O8
C10H18O8
C10H20O8
C10H16O8
C10H4O8
C10H14O11
C10H8O8
C10H10O8
C10H16O9
C10H18O9
C10H4O9
C10H10O9
C10H14O9
C10H12O9
C10H16O10
C10H14O10
C10H18O11

## Sheet: 5)Classification of the 78 chem
one addition	two additions	three additions
C9H14O5	C20H32O7	C20H34O6
C9H14O7	C20H32O9	C20H34O8
	C20H32O11	C20H34O10
C10H16O5		C20H34O12
C10H16O7
	C20H30O8	C19H30O6
C10H14O5	C20H30O10	C19H30O8
C10H14O7	C20H30O12	C19H30O10
		C19H30O12
	C20H32O8
C17H28O9	C20H32O10
C17H28O11	C20H32O12
C17H28O8
C17H28O10	C19H32O7
	C19H32O9
	C19H32O11
C17H26O9
C17H26O11	C19H32O8
	C19H32O10
	C19H32O12
C18H28O8
C18H28O10
	C19H28O7
C19H30O9	C19H28O9
C18H30O11	C19H28O11
C19H28O10
C19H28O12
	C18H30O7
C20H30O9	C18H30O9
C19H30O11	C18H30O11
	C18H30O6
C20H34O7	C18H30O8
C20H34O9	C18H30O10
	C18H28O7
	C18H28O9
	C18H28O11

## Sheet: 6) A-pinene data HESI Neg & Pos
Mass	Ions (Neg mode)	Signal		Mass	Ions (Pos mode)	Signal
55.0179	C3H3O	27649.8		55.0179	C3H3O	27649.8
55.0543	C4H7	915401		55.0543	C4H7	915401
57.0346	C3H5O	14602.2		57.0336	C3H5O	255555
57.07	C4H9	2126210		57.07	C4H9	2126210
59.0139	C2H3O2	120518		59.0492	C3H7O	10420000
59.0492	C3H7O	10420000		61.0284	C2H5O2	174085
60.9931	CHO3	35992		61.0648	C3H9O	44706.6
61.0284	C2H5O2	174085		65.0384	C5H5	50105.7
61.0648	C3H9O	44706.6		67.0542	C5H7	10203700
65.0384	C5H5	50105.7		69.0334	C4H5O	3128230
67.0542	C5H7	10203700		69.0698	C5H9	9526600
68.9982	C3HO2	23883.1		71.0126	C3H3O2	118302
69.0346	C4H5O	20795.4		71.049	C4H7O	12305700
69.0698	C5H9	9526600		71.0854	C5H11	88668.1
71.0139	C3H3O2	1554980		73.0283	C3H5O2	71905
71.049	C4H7O	12305700		73.0647	C4H9O	1514160
71.0854	C5H11	88668.1		75.044	C3H7O2	651833
72.9931	C2HO3	177839		79.0542	C6H7	7982860
73.0295	C3H5O2	47457.7		81.0334	C5H5O	722275
73.0647	C4H9O	1514160		81.0698	C6H9	72034200
75.0088	C2H3O3	217831		83.049	C5H7O	11465600
75.044	C3H7O2	651833		83.0854	C6H11	5217890
76.9881	CHO4	28337.3		85.0283	C4H5O2	1981560
79.0542	C6H7	7982860		85.0647	C5H9O	10512300
81.0334	C5H5O	722275		87.044	C4H7O2	3701450
81.0698	C6H9	72034200		87.0803	C5H11O	132618
83.0139	C4H3O2	11130.8		89.0596	C4H9O2	465222
83.049	C5H7O	11465600		91.0542	C7H7	12070100
83.0854	C6H11	5217890		93.0698	C7H9	95762000
85.0296	C4H5O2	193639		95.049	C6H7O	27619900
85.0647	C5H9O	10512300		95.0854	C7H11	78583700
87.0088	C3H3O3	397272		97.0283	C5H5O2	1056140
87.0452	C4H7O2	61736.7		97.0647	C6H9O	30699500
87.0803	C5H11O	132618		97.1011	C7H13	1456830
88.9881	C2HO4	37928.3		99.0439	C5H7O2	6749820
89.0245	C3H5O3	130733		99.0803	C6H11O	64752700
89.0596	C4H9O2	465222		101.06	C5H9O2	4121720
91.0037	C2H3O4	34489.9		101.096	C6H13O	36332.8
91.0542	C7H7	12070100		103.039	C4H7O3	212486
93.0698	C7H9	95762000		103.054	C8H7	12518.4
95.049	C6H7O	27619900		103.075	C5H11O2	80137.5
95.0854	C7H11	78583700		105.055	C4H9O3	137230
97.0296	C5H5O2	31932.2		105.07	C8H9	7429030
97.0647	C6H9O	30699500		107.049	C7H7O	6086380
97.1011	C7H13	1456830		107.085	C8H11	153206000
99.0088	C4H3O3	501758		109.065	C7H9O	265324000
99.0452	C5H7O2	19726.8		109.101	C8H13	332335000
99.0803	C6H11O	64752700		111.044	C6H7O2	7610750
101.024	C4H5O3	110319		111.08	C7H11O	34708200
101.061	C5H9O2	42123.1		111.117	C8H15	1767050
101.096	C6H13O	36332.8		113.023	C5H5O3	10489.7
103.004	C3H3O4	1077790		113.06	C6H9O2	17404200
103.04	C4H7O3	286895		113.096	C7H13O	4225010
103.054	C8H7	12518.4		115.039	C5H7O3	1052270
103.075	C5H11O2	80137.5		115.054	C9H7	250284
105.019	C3H5O4	16576.9		115.075	C6H11O2	10461500
105.055	C4H9O3	137230		117.054	C5H9O3	362420
105.07	C8H9	7429030		117.07	C9H9	2344280
107.049	C7H7O	6086380		117.091	C6H13O2	21789.6
107.085	C8H11	153206000		119.085	C9H11	26360800
109.065	C7H9O	265324000		121.065	C8H9O	3539200
109.101	C8H13	332335000		121.101	C9H13	106053000
111.009	C5H3O3	62181.6		123.044	C7H7O2	3885560
111.045	C6H7O2	51376.9		123.08	C8H11O	67817000
111.08	C7H11O	34708200		123.117	C9H15	107132000
111.117	C8H15	1767050		125.023	C6H5O3	26929.1
112.988	C4HO4	71813		125.06	C7H9O2	42672100
113.025	C5H5O3	1060460		125.096	C8H13O	37142400
113.061	C6H9O2	28128.6		125.132	C9H17	2812990
113.096	C7H13O	4225010		127.039	C6H7O3	1010330
115.004	C4H3O4	1084230		127.075	C7H11O2	77202800
115.04	C5H7O3	73723.3		127.112	C8H15O	8835760
115.054	C9H7	250284		129.054	C6H9O3	3301530
115.075	C6H11O2	10461500		129.07	C10H9	10338.2
116.983	C3HO5	19214.9		129.091	C7H13O2	7815730
117.019	C4H5O4	572359		129.127	C8H17O	17459.3
117.056	C5H9O3	67774.3		131.07	C6H11O3	1966470
117.07	C9H9	2344280		131.085	C10H11	4123470
117.091	C6H13O2	21789.6		133.065	C9H9O	233057
119.035	C4H7O4	102446		133.101	C10H13	83947300
119.085	C9H11	26360800		135.08	C9H11O	21637800
121.03	C7H5O2	41920.7		135.117	C10H15	1124780000
121.065	C8H9O	3539200		137.059	C8H9O2	2523200
121.101	C9H13	106053000		137.096	C9H13O	47233800
123.009	C6H3O3	30703		137.132	C10H17	134323000
123.045	C7H7O2	41363.3		139.039	C7H7O3	886739
123.08	C8H11O	67817000		139.075	C8H11O2	14954600
123.117	C9H15	107132000		139.112	C9H15O	119381000
124.988	C5HO4	12142.1		141.054	C7H9O3	6524430
125.025	C6H5O3	197761		141.091	C8H13O2	34834200
125.061	C7H9O2	74815.1		141.127	C9H17O	2854370
125.096	C8H13O	37142400		143.07	C7H11O3	10044600
125.132	C9H17	2812990		143.106	C8H15O2	7211280
127.004	C5H3O4	347781		145.05	C6H9O4	27257
127.04	C6H7O3	269277		145.065	C10H9O	13895.5
127.077	C7H11O2	29406.5		145.086	C7H13O3	3642900
127.112	C8H15O	8835760		145.101	C11H13	114972
129.019	C5H5O4	778625		147.08	C10H11O	3630560
129.056	C6H9O3	74893.3		147.117	C11H15	2208920
129.07	C10H9	10338.2		149.023	C8H5O3	1441090
129.091	C7H13O2	7815730		149.06	C9H9O2	510346
129.127	C8H17O	17459.3		149.096	C10H13O	58849800
130.999	C4H3O5	285968		149.132	C11H17	3016220
131.035	C5H7O4	152056		151.075	C9H11O2	10086300
131.07	C6H11O3	1966470		151.112	C10H15O	1426530000
131.085	C10H11	4123470		151.148	C11H19	2046080
133.014	C4H5O5	121803		153.054	C8H9O3	1137970
133.065	C9H9O	233057		153.091	C9H13O2	61000100
133.101	C10H13	83947300		153.127	C10H17O	1428940000
135.08	C9H11O	21637800		155.07	C8H11O3	7299260
135.117	C10H15	1124780000		155.106	C9H15O2	54148000
137.024	C7H5O3	516286		155.143	C10H19O	2454570
137.059	C8H9O2	2523200		157.049	C7H9O4	845225
137.096	C9H13O	47233800		157.086	C8H13O3	28549600
137.132	C10H17	134323000		157.122	C9H17O2	26984400
139.004	C6H3O4	188580		159.065	C7H11O4	2173380
139.04	C7H7O3	228130		159.101	C8H15O3	3631040
139.075	C8H11O2	14954600		159.116	C12H15	119759
139.112	C9H15O	119381000		161.06	C10H9O2	12107.9
140.983	C5HO5	157377		161.117	C8H17O3	3076750
141.019	C6H5O4	870511		161.132	C12H17	463622
141.056	C7H9O3	136467		163.075	C10H11O2	3736230
141.091	C8H13O2	34834200		163.111	C11H15O	825022
141.127	C9H17O	2854370		163.148	C12H19	74501.4
142.999	C5H3O5	88141.1		165.055	C9H9O3	82256.1
143.035	C6H7O4	200136		165.091	C10H13O2	45478500
143.07	C7H11O3	10044600		165.127	C11H17O	5366170
143.106	C8H15O2	7211280		167.07	C9H11O3	4594300
145.014	C5H5O5	250220		167.106	C10H15O2	188039000
145.051	C6H9O4	195446		167.143	C11H19O	8930180
145.065	C10H9O	13895.5		169.049	C8H9O4	18055.9
145.086	C7H13O3	3642900		169.086	C9H13O3	25034400
145.101	C11H13	114972		169.122	C10H17O2	441806000
146.994	C4H3O6	13583.5		169.158	C11H21O	12463.6
147.03	C5H7O5	85745.2		171.065	C8H11O4	1107160
147.08	C10H11O	3630560		171.101	C9H15O3	32268100
147.117	C11H15	2208920		171.138	C10H19O2	246207000
149.023	C8H5O3	1441090		173.081	C8H13O4	4047790
149.061	C9H9O2	10564		173.117	C9H17O3	3646550
149.096	C10H13O	58849800		173.132	C13H17	128258
149.132	C11H17	3016220		175.096	C8H15O4	327411
151.004	C7H3O4	53050.8		175.112	C12H15O	14176.9
151.04	C8H7O3	50910.2		175.148	C13H19	2248730
151.075	C9H11O2	10086300		177.054	C10H9O3	28337.2
151.112	C10H15O	1426530000		177.091	C11H13O2	47136.3
151.148	C11H19	2046080		177.127	C12H17O	233890
152.983	C6HO5	19942.8		177.163	C13H21	24595.8
153.019	C7H5O4	814159		179.07	C10H11O3	1121290
153.056	C8H9O3	49288.3		179.106	C11H15O2	1075840
153.092	C9H13O2	11139.9		179.143	C12H19O	1944920
153.127	C10H17O	1428940000		179.179	C13H23	31216.2
154.999	C6H3O5	292745		181.086	C10H13O3	9399900
155.035	C7H7O4	1144280		181.122	C11H17O2	8375970
155.072	C8H11O3	41562.1		181.158	C12H21O	19477.4
155.106	C9H15O2	54148000		183.065	C9H11O4	612325
155.143	C10H19O	2454570		183.101	C10H15O3	73892600
156.978	C5HO6	45701		183.138	C11H19O2	8857300
157.014	C6H5O5	196045		185.081	C9H13O4	5165810
157.051	C7H9O4	185990		185.117	C10H17O3	129652000
157.086	C8H13O3	28549600		185.153	C11H21O2	2023870
157.122	C9H17O2	26984400		187.06	C8H11O5	11966.1
158.994	C5H3O6	48815.8		187.096	C9H15O4	6130220
159.03	C6H7O5	197371		187.133	C10H19O3	6236560
159.066	C7H11O4	125837		187.148	C14H19	40542.9
159.101	C8H15O3	3631040		189.075	C8H13O5	60884.5
159.116	C12H15	119759		189.112	C9H17O4	1154500
161.009	C5H5O6	167266		189.128	C13H17O	11029.3
161.046	C6H9O5	95819.8		189.163	C14H21	51976.4
161.06	C10H9O2	12107.9		191.106	C12H15O2	35732.1
161.117	C8H17O3	3076750		191.143	C13H19O	81854.1
161.132	C12H17	463622		193.085	C11H13O3	19188.6
163.004	C8H3O4	157741		193.122	C12H17O2	332670
163.04	C9H7O3	11052.3		193.159	C13H21O	58016.2
163.077	C10H11O2	99902.8		195.065	C10H11O4	37559.8
163.111	C11H15O	825022		195.101	C11H15O3	455883
163.148	C12H19	74501.4		195.138	C12H19O2	2714380
165.019	C8H5O4	265967		195.174	C13H23O	929449
165.056	C9H9O3	70886.6		197.08	C10H13O4	2528850
165.092	C10H13O2	45478500		197.117	C11H17O3	4365480
165.127	C11H17O	5366170		197.153	C12H21O2	111474
166.999	C7H3O5	149063		199.06	C9H11O5	14340
167.035	C8H7O4	290935		199.096	C10H15O4	33182700
167.071	C9H11O3	71066.7		199.133	C11H19O3	4614490
167.106	C10H15O2	188039000		199.169	C12H23O2	379407
167.143	C11H19O	8930180		201.075	C9H13O5	526995
169.014	C7H5O5	325236		201.112	C10H17O4	22669700
169.051	C8H9O4	205937		201.148	C11H21O3	120587
169.087	C9H13O3	97622.1		201.163	C15H21	70527.6
169.122	C10H17O2	441806000		203.091	C9H15O5	769458
169.158	C11H21O	12463.6		203.127	C10H19O4	5513300
170.994	C6H3O6	42615		203.143	C14H19O	88550.5
171.03	C7H7O5	313533		203.179	C15H23	51582.2
171.066	C8H11O4	96268.2		205.086	C12H13O3	191543
171.101	C9H15O3	32268100		205.159	C14H21O	18005.4
171.138	C10H19O2	246207000		205.195	C15H25	20993.2
173.009	C6H5O6	185122		207.137	C13H19O2	42421.7
173.046	C7H9O5	166433		207.174	C14H23O	104270
173.082	C8H13O4	27297.5		209.117	C12H17O3	188764
173.117	C9H17O3	3646550		209.153	C13H21O2	438436
173.132	C13H17	128258		211.096	C11H15O4	250865
175.025	C6H7O6	124969		211.132	C12H19O3	1513360
175.061	C7H11O5	67201.4		211.169	C13H23O2	65111.6
175.096	C8H15O4	327411		213.075	C10H13O5	117044
175.112	C12H15O	14176.9		213.112	C11H17O4	3801980
175.148	C13H19	2248730		213.148	C12H21O3	210326
177.019	C9H5O4	26256.5		213.184	C13H25O2	7136020
177.056	C10H9O3	11030		215.091	C10H15O5	2596000
177.091	C11H13O2	47136.3		215.127	C11H19O4	1180050
177.127	C12H17O	233890		215.179	C16H23	1480460
177.163	C13H21	24595.8		217.107	C10H17O5	4466810
178.999	C8H3O5	18057		217.143	C11H21O4	34023.8
179.035	C9H7O4	115630		217.158	C15H21O	53182.3
179.072	C10H11O3	43196.1		217.195	C16H25	13111500
179.106	C11H15O2	1075840		219.122	C10H19O5	12330900
179.143	C12H19O	1944920		219.174	C15H23O	49989.9
179.179	C13H23	31216.2		219.21	C16H27	61548.3
181.014	C8H5O5	194738		221.153	C14H21O2	1286310
181.051	C9H9O4	126991		221.19	C15H25O	13279.4
181.087	C10H13O3	9399900		223.096	C12H15O4	102002
181.122	C11H17O2	8375970		223.133	C13H19O3	22767.6
181.158	C12H21O	19477.4		223.169	C14H23O2	88844.4
182.994	C7H3O6	52106.5		225.06	C7H13O8	13365.6
183.03	C8H7O5	555897		225.112	C12H17O4	67230.6
183.066	C9H11O4	111511		225.148	C13H21O3	104019
183.103	C10H15O3	74360.6		227.127	C12H19O4	257972
183.138	C11H19O2	8857300		227.164	C13H23O3	96735.6
185.009	C7H5O6	117864		227.179	C17H23	1056740
185.046	C8H9O5	283686		227.2	C14H27O2	9791.36
185.082	C9H13O4	67902.4		229.107	C11H17O5	113489
185.117	C10H17O3	129652000		229.143	C12H21O4	70685.2
185.153	C11H21O2	2023870		229.179	C13H25O3	35113
187.025	C7H7O6	237502		229.195	C17H25	6295920
187.061	C8H11O5	98870.4		231.086	C10H15O6	46114.9
187.096	C9H15O4	6130220		231.122	C11H19O5	49535.5
187.134	C10H19O3	457130		231.174	C16H23O	919939
187.148	C14H19	40542.9		231.21	C17H27	1796000
189.041	C7H9O6	99193.5		233.102	C10H17O6	470657
189.077	C8H13O5	36149.5		233.19	C16H25O	944978
189.112	C9H17O4	1154500		235.169	C15H23O2	283534
189.128	C13H17O	11029.3		237.148	C14H21O3	67692.9
189.163	C14H21	51976.4		237.185	C15H25O2	125483
190.999	C9H3O5	27000.4		239.127	C13H19O4	11380.1
191.035	C10H7O4	19975.2		239.164	C14H23O3	59873.1
191.106	C12H15O2	35732.1		241.143	C13H21O4	52288.4
191.143	C13H19O	81854.1		241.216	C15H29O2	16166.9
193.014	C9H5O5	57448.2		243.174	C17H23O	492871
193.051	C10H9O4	92411.2		243.21	C18H27	425634
193.085	C11H13O3	19188.6		245.19	C17H25O	2523860
193.122	C12H17O2	332670		245.226	C18H29	591130
193.159	C13H21O	58016.2		247.169	C16H23O2	117358
194.993	C8H3O6	13603.3		247.205	C17H27O	221067
195.03	C9H7O5	357667		249.185	C16H25O2	645907
195.066	C10H11O4	89786.3		251.164	C15H23O3	163790
195.101	C11H15O3	455883		251.2	C16H27O2	1606240
195.138	C12H19O2	2714380		253.18	C15H25O3	36044.8
195.174	C13H23O	929449		255.159	C14H23O4	41741.7
197.009	C8H5O6	101201		255.21	C19H27	33943
197.046	C9H9O5	850471		257.226	C19H29	320744
197.082	C10H13O4	2528850		259.169	C17H23O2	24732.7
197.117	C11H17O3	4365480		259.205	C18H27O	110192
197.153	C12H21O2	111474		259.242	C19H31	173024
198.988	C7H3O7	11236.8		261.185	C17H25O2	2664740
199.025	C8H7O6	227116		261.221	C18H29O	34071.7
199.061	C9H11O5	112606		263.164	C16H23O3	83529.1
199.098	C10H15O4	72524.3		263.2	C17H27O2	1239170
199.133	C11H19O3	4614490		265.179	C16H25O3	295243
199.169	C12H23O2	379407		267.159	C15H23O4	39401.5
201.004	C7H5O7	33913.4		267.195	C16H27O3	61523.3
201.041	C8H9O6	232106		267.21	C20H27	39474.3
201.077	C9H13O5	58834.1		269.138	C14H21O5	15299.1
201.112	C10H17O4	22669700		269.175	C15H25O4	74818.5
201.148	C11H21O3	120587		269.226	C20H29	4027200
201.163	C15H21	70527.6		271.205	C19H27O	15909
203.02	C7H7O7	75849.6		271.242	C20H31	28055900
203.056	C8H11O6	100713		273.221	C19H29O	66582.1
203.091	C9H15O5	769458		273.257	C20H33	8286530
203.127	C10H19O4	5513300		275.2	C18H27O2	347381
203.143	C14H19O	88550.5		277.18	C17H25O3	966657
203.179	C15H23	51582.2		277.216	C18H29O2	999519
205.015	C10H5O5	28196.2		279.159	C16H23O4	5510030
205.036	C7H9O7	27941.2		279.195	C17H27O3	1985800
205.072	C8H13O6	10192.5		281.174	C16H25O4	54115.8
205.086	C12H13O3	191543		281.211	C17H29O3	17694.5
205.159	C14H21O	18005.4		283.191	C16H27O4	75064
205.195	C15H25	20993.2		283.205	C20H27O	25044.3
206.994	C9H3O6	189780		285.17	C15H25O5	29767.7
207.03	C10H7O5	68048.2		285.221	C20H29O	2749120
207.066	C11H11O4	23897.8		287.2	C19H27O2	189660
207.137	C13H19O2	42421.7		287.221	C16H31O4	15885.9
207.174	C14H23O	104270		287.237	C20H31O	12769600
209.009	C9H5O6	66619		289.216	C19H29O2	2109480
209.046	C10H9O5	185155		289.252	C20H33O	2865870
209.082	C11H13O4	12027.4		291.231	C19H31O2	2189910
209.117	C12H17O3	188764		293.174	C17H25O4	144896
209.153	C13H21O2	438436		293.211	C18H29O3	842252
211.025	C9H7O6	251496		295.19	C17H27O4	621898
211.061	C10H11O5	347467		295.226	C18H31O3	10233.7
211.096	C11H15O4	250865		297.082	C10H17O10	44899.6
211.132	C12H19O3	1513360		297.169	C16H25O5	10338.9
211.169	C13H23O2	65111.6		297.206	C17H29O4	249899
213.004	C8H5O7	22051.6		301.202	C16H29O5	13901.7
213.041	C9H9O6	236986		301.216	C20H29O2	13144600
213.077	C10H13O5	117044		303.195	C19H27O3	142605
213.112	C11H17O4	3801980		303.231	C20H31O2	38961100
213.148	C12H21O3	210326		305.211	C19H29O3	1450990
213.184	C13H25O2	7136020		305.247	C20H33O2	18332300
214.968	C3H3O11	31925.6		307.226	C19H31O3	1954020
215.02	C8H7O7	59264		307.263	C20H35O2	12969.1
215.056	C9H11O6	274373		309.205	C18H29O4	1439840
215.093	C10H15O5	36093.8		309.242	C19H33O3	949976
215.127	C11H19O4	1180050		311.185	C17H27O5	73603.8
215.179	C16H23	1480460		311.221	C18H31O4	34797.9
217.036	C8H9O7	94467.5		313.201	C17H29O5	18068.4
217.072	C9H13O6	63346.4		315.093	C10H19O11	12836.1
217.107	C10H17O5	4466810		315.181	C16H27O6	43320.8
217.143	C11H21O4	34023.8		317.197	C16H29O6	16407.6
217.158	C15H21O	53182.3		317.211	C20H29O3	1844660
217.195	C16H25	13111500		319.175	C15H27O7	11990.9
219.015	C7H7O8	21736.5		319.19	C19H27O4	31311.5
219.031	C11H7O5	24998.6		319.226	C20H31O3	8542010
219.051	C8H11O7	37361.9		321.206	C19H29O4	951734
219.122	C10H19O5	12330900		321.242	C20H33O3	15915100
219.174	C15H23O	49989.9		323.221	C19H31O4	1267780
219.21	C16H27	61548.3		323.258	C20H35O3	9882970
221.003	C17HO	10529.6		325.201	C18H29O5	110718
221.009	C10H5O6	37184.7		325.237	C19H33O4	52814.9
221.046	C11H9O5	128431		327.008	C23H3O3	218622
221.082	C12H13O4	12906		327.216	C18H31O5	19761.5
221.153	C14H21O2	1286310		328.941	C10HO13	13716.3
221.19	C15H25O	13279.4		331.176	C16H27O7	14945.6
222.989	C9H3O7	36082.3		333.191	C16H29O7	16096
222.994	C2H7O12	17483.1		333.205	C20H29O4	623403
223.025	C10H7O6	55763.9		333.227	C17H33O6	9683.88
223.062	C11H11O5	134131		335.221	C20H31O4	4456510
223.096	C12H15O4	102002		337.2	C19H29O5	96828
223.133	C13H19O3	22767.6		337.237	C20H33O4	5614860
223.169	C14H23O2	88844.4		339.216	C19H31O5	169553
225.004	C9H5O7	36025.3		339.252	C20H35O4	2007210
225.041	C10H9O6	146587		341.232	C19H33O5	26021.1
225.06	C7H13O8	13365.6		347.221	C21H31O4	38504.8
225.077	C11H13O5	60636.1		349.2	C20H29O5	68323.2
225.112	C12H17O4	67230.6		349.237	C21H33O4	144787
225.148	C13H21O3	104019		351.202	C16H31O8	13342.4
227.02	C9H7O7	50231.9		351.216	C20H31O5	1244910
227.056	C10H11O6	154754		351.252	C21H35O4	15841.2
227.093	C11H15O5	28370.4		353.195	C19H29O6	10289
227.127	C12H19O4	257972		353.232	C20H33O5	1570760
227.164	C13H23O3	96735.6		355.211	C19H31O6	18953.8
227.179	C17H23	1056740		355.247	C20H35O5	765380
227.2	C14H27O2	9791.36		367.211	C20H31O6	91374.4
229.036	C9H9O7	102986		369.226	C20H33O6	296055
229.072	C10H13O6	75639.3		371.242	C20H35O6	284555
229.107	C11H17O5	113489		385.221	C20H33O7	20267.9
229.143	C12H21O4	70685.2		403.232	C20H35O8	33147.2
229.179	C13H25O3	35113		445.119	C15H25O15	1195100
229.195	C17H25	6295920		475.378	C30H51O4	19618.4
231.015	C8H7O8	13932.9		491.372	C30H51O5	16526.6
231.051	C9H11O7	86986.4		223.205	C15H27O	9212.59
231.088	C10H15O6	41324.7		397.222	C21H33O7	9218.39
231.122	C11H19O5	49535.5		381.315	C27H41O	9315.36
231.174	C16H23O	919939		353.32	C26H41	9367.05
231.21	C17H27	1796000		395.243	C22H35O6	9455.63
232.973	C10HO7	20276.5		391.234	C19H35O8	9522.32
233.031	C8H9O8	44312.9		273.242	C16H33O3	9533.57
233.067	C9H13O7	29613.7		437.291	C25H41O6	9605.26
233.102	C10H17O6	470657		249.112	C14H17O4	9675.02
233.19	C16H25O	944978		361.238	C22H33O4	9824.2
234.989	C10H3O7	74664		293.138	C16H21O5	9994.56
235.061	C12H11O5	62833.5		239.091	C12H15O5	10174.2
235.098	C13H15O4	183788		501.27	C25H41O10	10350.4
235.169	C15H23O2	283534		229.071	C10H13O6	10386.7
237.004	C10H5O7	16841		337.186	C15H29O8	10502.4
237.041	C11H9O6	102047		485.312	C26H45O8	10552.5
237.077	C12H13O5	38877.2		337.221	C16H33O7	10616.9
237.148	C14H21O3	67692.9		423.363	C30H47O	10634.8
237.185	C15H25O2	125483		165.164	C12H21	11079.9
239.02	C10H7O7	45308.2		353.159	C18H25O7	11098.4
239.056	C11H11O6	337503		421.346	C30H45O	11314.4
239.093	C12H15O5	18805.5		253.216	C16H29O2	11381.5
239.127	C13H19O4	11380.1		407.28	C24H39O5	11524.2
239.164	C14H23O3	59873.1		371.259	C24H35O3	11724.1
241.036	C10H9O7	92536.8		233.117	C14H17O3	11806.6
241.072	C11H13O6	124046		347.185	C20H27O5	11857.4
241.109	C12H17O5	17896.1		365.32	C27H41	12046.1
241.143	C13H21O4	52288.4		235.118	C10H19O6	12300.1
241.216	C15H29O2	16166.9		387.202	C19H31O8	12408.9
243.015	C9H7O8	12574		365.269	C22H37O4	12450.2
243.051	C10H11O7	79635.5		271.118	C13H19O6	12686.5
243.088	C11H15O6	27709.6		269.248	C17H33O2	12743.6
243.174	C17H23O	492871		283.118	C14H19O6	12988.6
243.21	C18H27	425634		601.192	C30H33O13	13064.3
245.03	C9H9O8	28693.4		391.248	C23H35O5	13282.5
245.067	C10H13O7	71730.7		243.195	C14H27O3	13324.2
245.19	C17H25O	2523860		245.102	C11H17O6	13492.7
245.226	C18H29	591130		283.263	C18H35O2	14290.3
247.046	C9H11O8	33383.2		183.174	C12H23O	14477.6
247.083	C10H15O7	14541.5		537.342	C30H49O8	14642.6
247.169	C16H23O2	117358		315.232	C21H31O2	15211.9
247.205	C17H27O	221067		485.326	C30H45O5	15608
248.974	C3H5O13	24270.4		267.123	C14H19O5	16419.3
249.041	C12H9O6	47298.1		235.133	C14H19O3	16436.8
249.077	C13H13O5	31029.2		323.149	C17H23O6	16859.6
249.185	C16H25O2	645907		185.133	C14H17	17273
250.983	C10H3O8	11139.2		217.071	C9H13O6	17625.2
251.02	C11H7O7	12133.2		189.091	C12H13O2	18476.1
251.093	C13H15O5	42786.8		253.107	C13H17O5	18522.4
251.164	C15H23O3	163790		285.134	C14H21O6	19781.9
251.2	C16H27O2	1606240		469.331	C30H45O4	19812.5
253.072	C12H13O6	193341		323.206	C15H31O7	20044.4
253.108	C13H17O5	42860.6		373.222	C19H33O7	20095.2
253.18	C15H25O3	36044.8		393.213	C18H33O9	20165.6
255.051	C11H11O7	128611		159.08	C11H11O	20244.9
255.088	C12H15O6	43144.9		411.222	C18H35O10	21208.4
255.159	C14H23O4	41741.7		375.202	C18H31O8	21721.3
255.21	C19H27	33943		409.244	C19H37O9	21724
257.031	C10H9O8	38301.5		311.148	C16H23O6	21872.3
257.067	C11H13O7	57994.9		209.081	C11H13O4	23084.3
257.103	C12H17O6	10215.6		389.254	C20H37O7	24261.3
257.226	C19H29	320744		453.286	C25H41O7	24631
259.046	C10H11O8	57601.4		373.259	C20H37O6	24779.3
259.082	C11H15O7	41510.5		273.134	C13H21O6	25589
259.169	C17H23O2	24732.7		379.248	C22H35O5	26139.3
259.205	C18H27O	110192		331.227	C21H31O3	26465
259.242	C19H31	173024		257.211	C15H29O3	27178.5
261.062	C10H13O8	29118.2		365.217	C17H33O8	27245.7
261.078	C14H13O5	12365.7		249.221	C17H29O	27551.3
261.185	C17H25O2	2664740		363.254	C22H35O4	27738
261.221	C18H29O	34071.7		485.275	C25H41O9	28430.3
263.057	C13H11O6	117884		259.118	C12H19O6	29274.6
263.164	C16H23O3	83529.1		389.269	C24H37O4	30810.8
263.2	C17H27O2	1239170		381.191	C20H29O7	31483.5
264.999	C11H5O8	12906		277.143	C16H21O4	32554.5
265.036	C12H9O7	27000.4		285.258	C21H33	32697.8
265.108	C14H17O5	68395.8		279.232	C18H31O2	33641
265.179	C16H25O3	295243		503.337	C30H47O6	33850.9
267.051	C12H11O7	74033.9		181.049	C9H9O4	34734.3
267.088	C13H15O6	52772.8		417.212	C20H33O9	35290.1
267.159	C15H23O4	39401.5		453.336	C30H45O3	35557.4
267.195	C16H27O3	61523.3		313.275	C19H37O3	36329.2
267.21	C20H27	39474.3		359.207	C18H31O7	36411.1
269.031	C11H9O8	26922.9		215.143	C15H19O	36854.1
269.067	C12H13O7	123137		281.138	C15H21O5	37378.9
269.103	C13H17O6	41056.2		255.195	C15H27O3	38552
269.138	C14H21O5	15299.1		247.133	C15H19O3	38669.4
269.175	C15H25O4	74818.5		371.315	C22H43O4	40881.2
269.226	C20H29	4027200		437.342	C30H45O2	41089.9
271.046	C11H11O8	74996.7		337.273	C21H37O3	44585.1
271.083	C12H15O7	30847.4		245.175	C13H25O4	44889.4
271.205	C19H27O	15909		239.2	C15H27O2	45316
271.242	C20H31	28055900		301.253	C21H33O	45461.2
273.062	C11H13O8	88966.4		261.148	C16H21O3	46413.3
273.098	C12H17O7	13563.5		299.223	C17H31O4	47050.4
273.221	C19H29O	66582.1		209.19	C14H25O	48308.7
273.257	C20H33	8286530		307.154	C17H23O5	48513
275.077	C11H15O8	16754.8		241.18	C14H25O3	53673.6
275.2	C18H27O2	347381		383.243	C21H35O6	55293.9
277.072	C14H13O6	90130.4		187.112	C13H15O	57514.1
277.108	C15H17O5	30446		255.232	C16H31O2	57951.1
277.18	C17H25O3	966657		351.18	C19H27O6	59203.3
277.216	C18H29O2	999519		299.15	C15H23O6	59666.1
279.051	C13H11O7	45629.8		391.284	C24H39O4	62657.9
279.088	C14H15O6	32999.5		391.109	C12H23O14	62804.6
279.159	C16H23O4	5510030		357.191	C18H29O7	64253.8
279.195	C17H27O3	1985800		183.081	C13H11O	68148
281.067	C13H13O7	95635.1		245.139	C12H21O5	68151.2
281.103	C14H17O6	24727		237.112	C13H17O4	69548.1
281.174	C16H25O4	54115.8		245.153	C16H21O2	71791.6
281.211	C17H29O3	17694.5		251.128	C14H19O4	73573
283.046	C12H11O8	55005.1		321.169	C18H25O5	76059.9
283.083	C13H15O7	51945.5		355.175	C18H27O7	76172.5
283.119	C14H19O6	12301.8		341.159	C17H25O7	76179.3
283.191	C16H27O4	75064		201.127	C14H17O	76337.2
283.205	C20H27O	25044.3		293.247	C19H33O2	78091.6
285.062	C12H13O8	49717.3		243.159	C13H23O4	78914.4
285.098	C13H17O7	20582.2		329.16	C16H25O7	80350.5
285.17	C15H25O5	29767.7		335.207	C16H31O7	84784.8
285.221	C20H29O	2749120		173.096	C12H13O	87501.7
287.041	C11H11O9	10563.6		369.264	C21H37O5	88074.4
287.077	C12H15O8	172184		255.123	C13H19O5	88252.5
287.2	C19H27O2	189660		331.191	C20H27O4	89081.7
287.221	C16H31O4	15885.9		375.238	C19H35O7	93215
287.237	C20H31O	12769600		371.207	C19H31O7	97184.7
289.057	C11H13O9	21951.8		349.221	C17H33O7	99669.1
289.093	C12H17O8	10474.7		365.305	C23H41O3	100618
289.216	C19H29O2	2109480		343.175	C17H27O7	104282
289.252	C20H33O	2865870		399.202	C20H31O8	106330
291.088	C15H15O6	29178.6		395.227	C18H35O9	107082
291.231	C19H31O2	2189910		295.154	C16H23O5	107118
293.067	C14H13O7	70182.6		599.176	C30H31O13	111824
293.103	C15H17O6	22756.6		269.211	C16H29O3	113205
293.174	C17H25O4	144896		207.101	C12H15O3	116860
293.211	C18H29O3	842252		259.191	C14H27O4	116888
295.046	C13H11O8	18908.2		401.217	C20H33O8	117821
295.082	C14H15O7	50681.4		521.347	C30H49O7	121561
295.19	C17H27O4	621898		241.107	C12H17O5	126994
295.226	C18H31O3	10233.7		343.248	C19H35O5	127069
297.062	C13H13O8	45497		507.368	C30H51O6	129034
297.082	C10H17O10	44899.6		257.139	C13H21O5	131229
297.098	C14H17O7	18252.6		265.216	C17H29O2	132595
297.171	C16H25O5	52338.3		357.067	C11H17O13	134805
297.206	C17H29O4	249899		227.091	C11H15O5	136154
299.078	C13H15O8	46005.6		225.185	C14H25O2	138261
301.057	C12H13O9	23144.5		191.179	C14H23	138420
301.093	C13H17O8	69183		247.154	C12H23O5	140935
301.129	C14H21O7	14172.5		457.368	C30H49O3	141851
301.202	C16H29O5	13901.7		439.357	C30H47O2	142384
301.216	C20H29O2	13144600		369.191	C19H29O7	142570
303.073	C12H15O9	17377.6		271.155	C14H23O5	158911
303.195	C19H27O3	142605		327.252	C19H35O4	163438
303.231	C20H31O2	38961100		357.264	C20H37O5	163921
305.068	C15H13O7	28043.5		353.269	C21H37O4	169117
305.104	C16H17O6	16353.7		357.227	C19H33O6	169920
305.211	C19H29O3	1450990		315.217	C17H31O5	176261
305.247	C20H33O2	18332300		291.159	C17H23O4	176499
307.083	C15H15O7	43051.3		265.144	C15H21O4	181875
307.119	C16H19O6	15406.4		317.248	C21H33O2	182244
307.226	C19H31O3	1954020		205.122	C13H17O2	189361
307.263	C20H35O2	12969.1		221.117	C13H17O3	192721
309.062	C14H13O8	39360.9		393.248	C19H37O8	202804
309.099	C15H17O7	26347.7		331.212	C17H31O6	214253
309.205	C18H29O4	1439840		283.154	C15H23O5	217927
309.242	C19H33O3	949976		249.149	C15H21O3	219707
311.041	C13H11O9	13291.4		319.263	C21H35O2	220683
311.078	C14H15O8	47185.2		335.185	C19H27O5	222436
311.114	C15H19O7	16069.1		505.352	C30H49O6	222540
311.185	C17H27O5	73603.8		487.342	C30H47O5	225938
311.221	C18H31O4	34797.9		325.164	C17H25O6	227679
313.057	C13H13O9	17330.3		219.138	C14H19O2	237720
313.073	C17H13O6	45607.6		523.363	C30H51O7	252248
313.093	C14H17O8	28671.4		333.243	C21H33O3	255161
313.13	C15H21O7	10043.1		229.158	C16H21O	255888
313.165	C16H25O6	26225.4		289.179	C18H25O3	262684
313.201	C17H29O5	18068.4		359.243	C19H35O6	266803
315.073	C13H15O9	39355		171.117	C13H15	277846
315.093	C10H19O11	12836.1		381.227	C21H33O6	278145
315.109	C14H19O8	31874.2		343.212	C18H31O6	284941
315.181	C16H27O6	43320.8		363.217	C21H31O5	291036
317.088	C13H17O9	11655.9		273.185	C18H25O2	297159
317.197	C16H29O6	16407.6		313.237	C18H33O4	301352
317.211	C20H29O3	1844660		315.196	C20H27O3	309047
319.046	C15H11O8	12647		199.148	C15H19	315728
319.083	C16H15O7	56972.2		243.123	C12H19O5	323052
319.175	C15H27O7	11990.9		335.258	C21H35O3	325621
319.19	C19H27O4	31311.5		455.352	C30H47O3	352434
319.226	C20H31O3	8542010		275.237	C19H31O	354307
321.061	C15H13O8	18917		241.195	C18H25	368823
321.098	C16H17O7	18514.3		157.101	C12H13	384229
321.206	C19H29O4	951734		305.174	C18H25O4	387045
321.242	C20H33O3	15915100		345.227	C18H33O6	388081
323.041	C14H11O9	10908.7		235.206	C16H27O	389411
323.077	C15H15O8	35362.6		341.269	C20H37O4	404172
323.114	C16H19O7	9999.04		365.196	C20H29O6	409631
323.221	C19H31O4	1267780		327.18	C17H27O6	416512
323.258	C20H35O3	9882970		253.144	C14H21O4	417910
325.057	C14H13O9	10551.2		329.232	C18H33O5	421892
325.093	C15H17O8	37996.5		361.222	C18H33O7	428819
325.13	C16H21O7	11300.5		471.347	C30H47O4	447699
325.201	C18H29O5	110718		275.164	C17H23O3	462168
325.237	C19H33O4	52814.9		339.18	C18H27O6	473971
327.008	C23H3O3	218622		313.114	C11H21O10	484466
327.073	C14H15O9	15695.1		281.05	C9H13O10	485549
327.109	C15H19O8	11976		357.206	C22H29O4	499113
327.146	C16H23O7	12356.2		387.238	C20H35O7	499240
327.18	C17H27O6	14566.3		341.196	C18H29O6	500175
327.216	C18H31O5	19761.5		213.163	C16H21	506720
328.941	C10HO13	13716.3		373.098	C12H21O13	570469
329.052	C13H13O10	10488.2		331.002	C22H3O4	589750
329.088	C14H17O9	32669.5		299.201	C20H27O2	630091
329.125	C15H21O8	16615.3		309.169	C17H25O5	641131
331.068	C13H15O10	15094.7		365.233	C21H33O5	659376
331.104	C14H19O9	13478.5		367.248	C21H35O5	719096
331.176	C16H27O7	14945.6		161.096	C11H13O	733833
333.062	C16H13O8	12250.6		379.232	C18H35O8	745132
333.099	C17H17O7	38983		257.189	C18H25O	765370
333.191	C16H29O7	16096		383.207	C20H31O7	771818
333.205	C20H29O4	623403		377.253	C19H37O7	862014
333.227	C17H33O6	9683.88		489.358	C30H49O5	879101
335.078	C16H15O8	32860.2		473.363	C30H49O4	1050350
335.113	C17H19O7	21562.8		323.185	C18H27O5	1058780
335.221	C20H31O4	4456510		361.258	C19H37O6	1122490
337.057	C15H13O9	18090.4		345.264	C19H37O5	1503200
337.093	C16H17O8	18813.4		291.195	C18H27O3	2021990
337.2	C19H29O5	96828		307.19	C18H27O4	2231230
337.237	C20H33O4	5614860		313.165	C16H25O6	109294
339.072	C15H15O9	19624.1		345.192	C17H29O7	170160
339.109	C16H19O8	11338.2		347.171	C16H27O8	181705
339.216	C19H31O5	169553		363.273	C19H39O6	1034390
339.252	C20H35O4	2007210		379.269	C19H39O7	571725
341.067	C18H13O7	9700.7		395.264	C19H39O8	383079
341.088	C15H17O9	18475.2		397.242	C18H37O9	151687
341.125	C16H21O8	11149.9		411.258	C19H39O9	106941
341.161	C17H25O7	151492		419.301	C22H43O7	208894
341.196	C18H29O6	14450.5		429.089	C14H21O15	140912
341.232	C19H33O5	26021.1		469.317	C26H45O7	112675
343.068	C14H15O10	12210
343.104	C15H19O9	12517.8
343.141	C16H23O8	9888.57
345.083	C14H17O10	14023.4
347.077	C17H15O8	44595.3
347.114	C18H19O7	23343.5
347.221	C21H31O4	38504.8
349.056	C16H13O9	88733.4
349.093	C17H17O8	19848.8
349.13	C18H21O7	11483.1
349.2	C20H29O5	68323.2
349.237	C21H33O4	144787
351.072	C16H15O9	23560.9
351.109	C17H19O8	21925.6
351.202	C16H31O8	13342.4
351.216	C20H31O5	1244910
351.252	C21H35O4	15841.2
353.051	C15H13O10	11096.9
353.088	C16H17O9	16166
353.125	C17H21O8	13583.5
353.195	C19H29O6	10289
353.232	C20H33O5	1570760
355.068	C15H15O10	12590.5
355.083	C19H15O7	12206.4
355.104	C16H19O9	18036.7
355.211	C19H31O6	18953.8
355.247	C20H35O5	765380
357.12	C16H21O9	14675
357.156	C17H25O8	9024.45
359.099	C15H19O10	13084.5
361.057	C17H13O9	10749.1
361.094	C18H17O8	19847.8
361.13	C19H21O7	17132.3
363.072	C17H15O9	21977.5
363.109	C18H19O8	24613.9
365.088	C17H17O9	11169.2
365.125	C18H21O8	15115.1
367.067	C16H15O10	10681.3
367.104	C17H19O9	10450.8
367.141	C18H23O8	9741.02
367.211	C20H31O6	91374.4
369.083	C16H17O10	12361.9
369.099	C20H17O7	13197.4
369.12	C17H21O9	13697.6
369.226	C20H33O6	296055
371.078	C19H15O8	18431.4
371.202	C26H27O2	17584.4
371.242	C20H35O6	284555
373.094	C19H17O8	34297.1
373.114	C16H21O10	10102.1
373.13	C20H21O7	21836.5
373.151	C17H25O9	9238.42
375.073	C18H15O9	18941.2
375.109	C19H19O8	15382.9
377.088	C18H17O9	21455.2
377.125	C19H21O8	18694.5
379.104	C18H19O9	15900.6
381.083	C17H17O10	13325.5
381.12	C18H21O9	16405.7
383.099	C17H19O10	13085.4
383.135	C18H23O9	8942.79
385.094	C20H17O8	20319.8
385.221	C20H33O7	20267.9
387.073	C19H15O9	15081.4
387.11	C20H19O8	11338.8
387.146	C21H23O7	12133.9
389.089	C19H17O9	23418.6
389.125	C20H21O8	20868.1
391.104	C19H19O9	25300.2
393.083	C18H17O10	11089.4
393.12	C19H21O9	13503.2
395.099	C18H19O10	12172.3
399.11	C21H19O8	16348.2
399.146	C22H23O7	10198.3
401.089	C20H17O9	21221.4
401.125	C21H21O8	23975
403.104	C20H19O9	30067
403.141	C21H23O8	13231.7
403.232	C20H35O8	33147.2
405.084	C19H17O10	12242.6
405.12	C20H21O9	18572.8
407.099	C19H19O10	12757
413.125	C22H21O8	11477.6
415.105	C21H19O9	20477.5
417.084	C20H17O10	10879.8
419.099	C20H19O10	13420.3
419.136	C21H23O9	11231.6
421.115	C20H21O10	11505.7
423.182	C25H27O6	15453.3
425.072	C18H17O12	30691.8
429.12	C22H21O9	15449.1
431.099	C21H19O10	10858.8
431.136	C22H23O9	12026.1
445.119	C15H25O15	1195100
475.378	C30H51O4	19618.4
491.372	C30H51O5	16526.6
497.094	C21H21O14	133085
501.088	C20H21O15	35799.3
581.187	C27H33O14	18841.7
