# Supplementary material for: On the formation of highly oxidized pollutants by autoxidation of terpenes under low-temperature-combustion conditions: the case of limonene and α -pinene
Source: Copernicus journal article supplement (doi:10.5194/acp-23-5715-2023), 2023-05-23
Supplement: Supplementary file 2 [file acp-23-5715-2023-supplement.zip]

Archive with 3 entries (3 files):
- acp-23-5715-2023-supplement-title-page.pdf
- ARTSUPPLEMENT Vedit.pdf
- Data supplements acp-2022-635.xlsx
