# Supplementary material for: On the formation of highly oxidized pollutants by autoxidation of terpenes under low-temperature-combustion conditions: the case of limonene and α -pinene
Source: Copernicus journal article supplement (doi:10.5194/acp-23-5715-2023), 2023-05-23
Supplement: Supplementary file 2 [file acp-23-5715-2023-supplement.zip › ARTSUPPLEMENT Vedit.pdf]

## **On the formation of highly oxidized pollutants by autoxidation of terpenes under low temperature combustion conditions: the case of limonene and $\alpha$ -pinene.**

Roland Benoit<sup>1</sup>, Nesrine Belhadj<sup>1,2</sup>, Zahraa Dbouk<sup>1,2</sup>, Maxence Lailliau<sup>1,2</sup>, and Philippe Dagaut<sup>1</sup>

<sup>1</sup>CNRS-INSIS, ICARE, Orléans, France, roland.benoit@cnrs-orleans.fr, nesrine.belhadj@cnrs-orleans.fr, maxence.lailliau@cnrs-orleans.fr, dagaut@cnrs-orleans.fr

<sup>2</sup>Université d'Orléans, Orléans, France

Fig. S1: Comparison of the mass spectra of pure (standard) and oxidated limonene

Tab. S1: APCI source +/–,  $\alpha$ -Pinene, limonene and APCI source  $\alpha$ -Pinene/limonene

Tab. S2: HESI source +/–,  $\alpha$ -Pinene, limonene and HESI source  $\alpha$ -Pinene/limonene

Fig. S2: AP and LM mass Spectra acquired with a HESI source in negative mode

Fig. S3: molecular forms resulting from an autoxidation mechanism of limonene: (a) even number of oxygens (b) odd number of oxygens.

Fig. S4: 3-D representation of all limonene oxidation data where DBE is used as third dimension and OSc vs DBE graph

Fig. S5: Some proposed formation routes to  $C_{10}H_{16}O_x$  species via autoxidation

Fig. S6: Superposition of chromatographs (UHPLC) of limonoaldehyde (left) and pinonic acid (right) standards and  $C_{10}H_{16}O_2$  and  $C_{10}H_{16}O_3$  isomers (positive ionization mode).

Fig. S7:  $D_2O$  exchanges for limonene and  $\alpha$ -pinene (direct infusion, negative ionization mode) - top; and derivatization of carbonyls in limonene and  $\alpha$ -pinene oxidation samples using 2,4-DNPH (UHPLC, positive mode) – bottom.

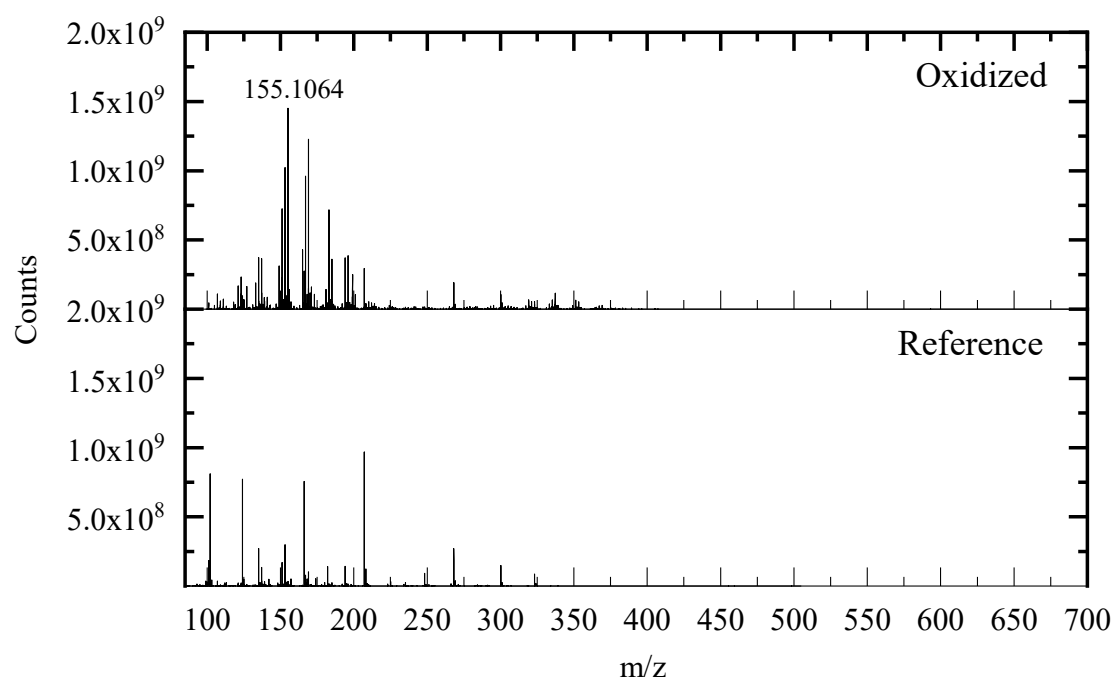

Fig. S1: Comparison of the mass spectra of pure (standard) and oxidated limonene

**Table S1.** Representation of the mass spectrometry data characterizing the oxidation of  $\alpha$ -pinene and limonene (ionization source: APCI positive and negative mode, JSR experiments).

|                     | $\alpha$ -Pinene                                                                                        |               |                                  | Limonene                                                                                               |               |                                  |
|---------------------|---------------------------------------------------------------------------------------------------------|---------------|----------------------------------|--------------------------------------------------------------------------------------------------------|---------------|----------------------------------|
| Source and mode     | APCI <sup>+</sup>                                                                                       |               | APCI <sup>-</sup>                | APCI <sup>+</sup>                                                                                      |               | APCI <sup>-</sup>                |
| Number of compounds | 646                                                                                                     |               | 503                              | 1321                                                                                                   |               | 1346                             |
| Distribution        | specific to positive mode<br>327                                                                        | common<br>319 | specific to negative mode<br>174 | specific to positive mode<br>516                                                                       | common<br>805 | specific to negative mode<br>542 |
| Venn graph          | 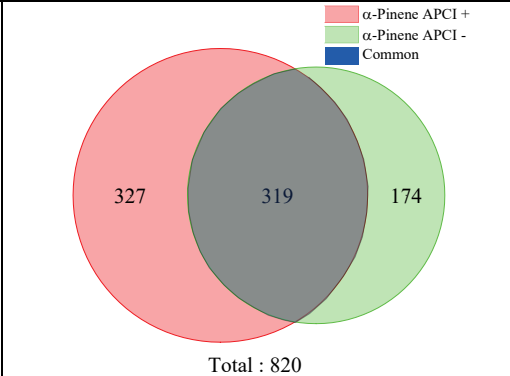 <p>Total : 820</p>    |               |                                  | 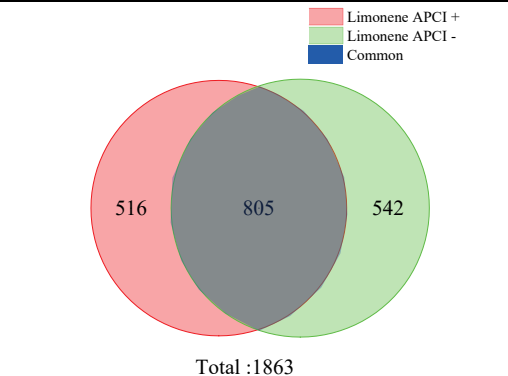 <p>Total : 1863</p> |               |                                  |
| VK vs DBE           | 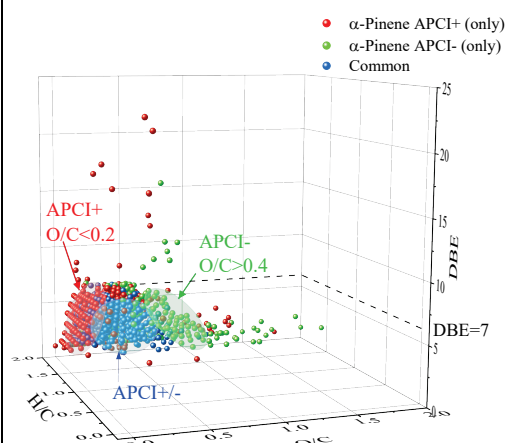                     |               |                                  | 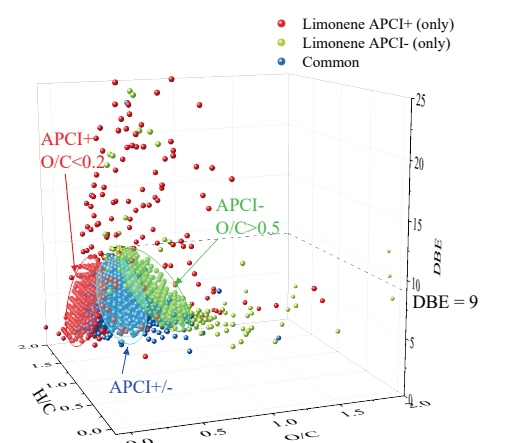                   |               |                                  |
|                     | 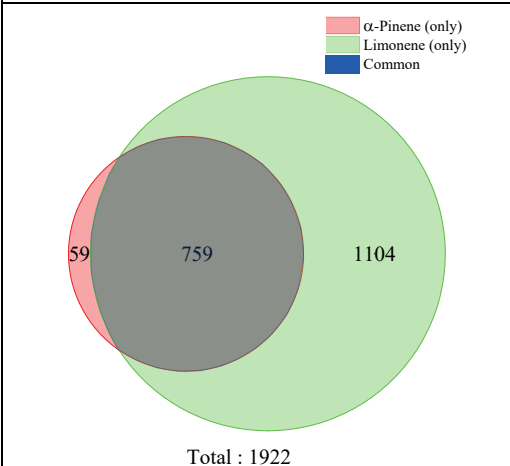 <p>Total : 1922</p> |               |                                  | 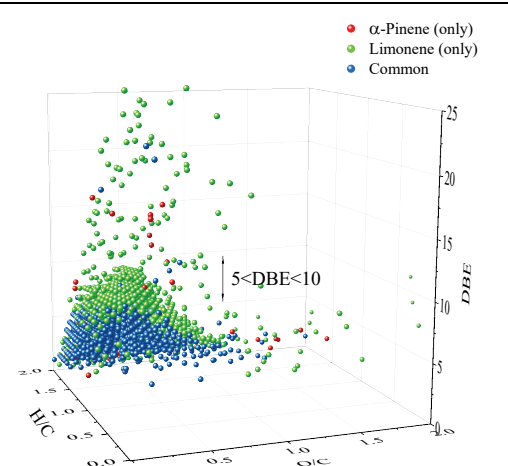                   |               |                                  |

**Table S2.** Representation of the mass spectrometry data characterizing the oxidation of  $\alpha$ -pinene and limonene (ionization source: HESI positive and negative modes, JSR experiments).

|                     | $\alpha$ -Pinene                                                                                        |               |                                  | Limonene                                                                                                |               |                                   |
|---------------------|---------------------------------------------------------------------------------------------------------|---------------|----------------------------------|---------------------------------------------------------------------------------------------------------|---------------|-----------------------------------|
| Source and mode     | HESI <sup>+</sup>                                                                                       |               | HESI <sup>-</sup>                | HESI <sup>+</sup>                                                                                       |               | HESI <sup>-</sup>                 |
| Number of compounds | 594                                                                                                     |               | 693                              | 1017                                                                                                    |               | 1864                              |
| Distribution        | specific to positive mode<br>282                                                                        | common<br>312 | specific to negative mode<br>381 | specific to positive mode<br>353                                                                        | common<br>482 | specific to negative mode<br>1342 |
| Venn Graph          | 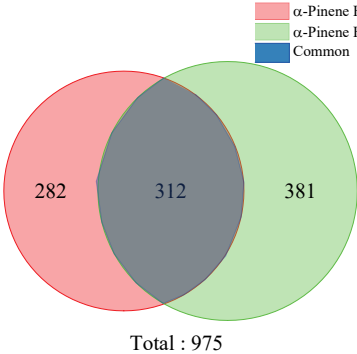 <p>Total : 975</p>    |               |                                  | 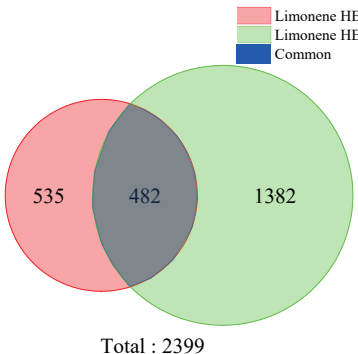 <p>Total : 2399</p> |               |                                   |
| VK vs DBE           | 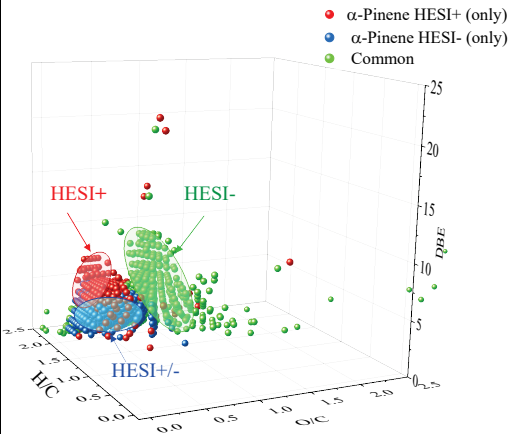                      |               |                                  | 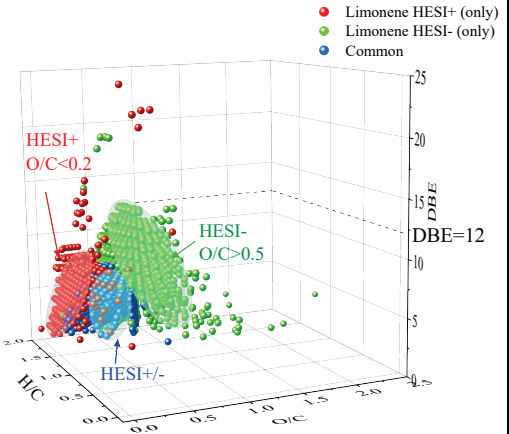                     |               |                                   |
|                     | 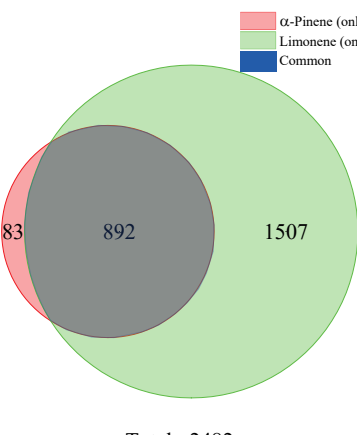 <p>Total : 2482</p> |               |                                  | 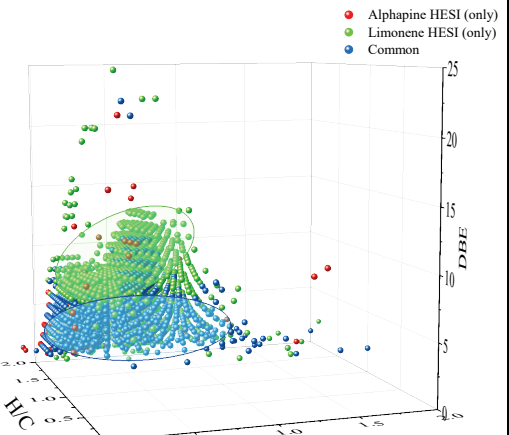                    |               |                                   |

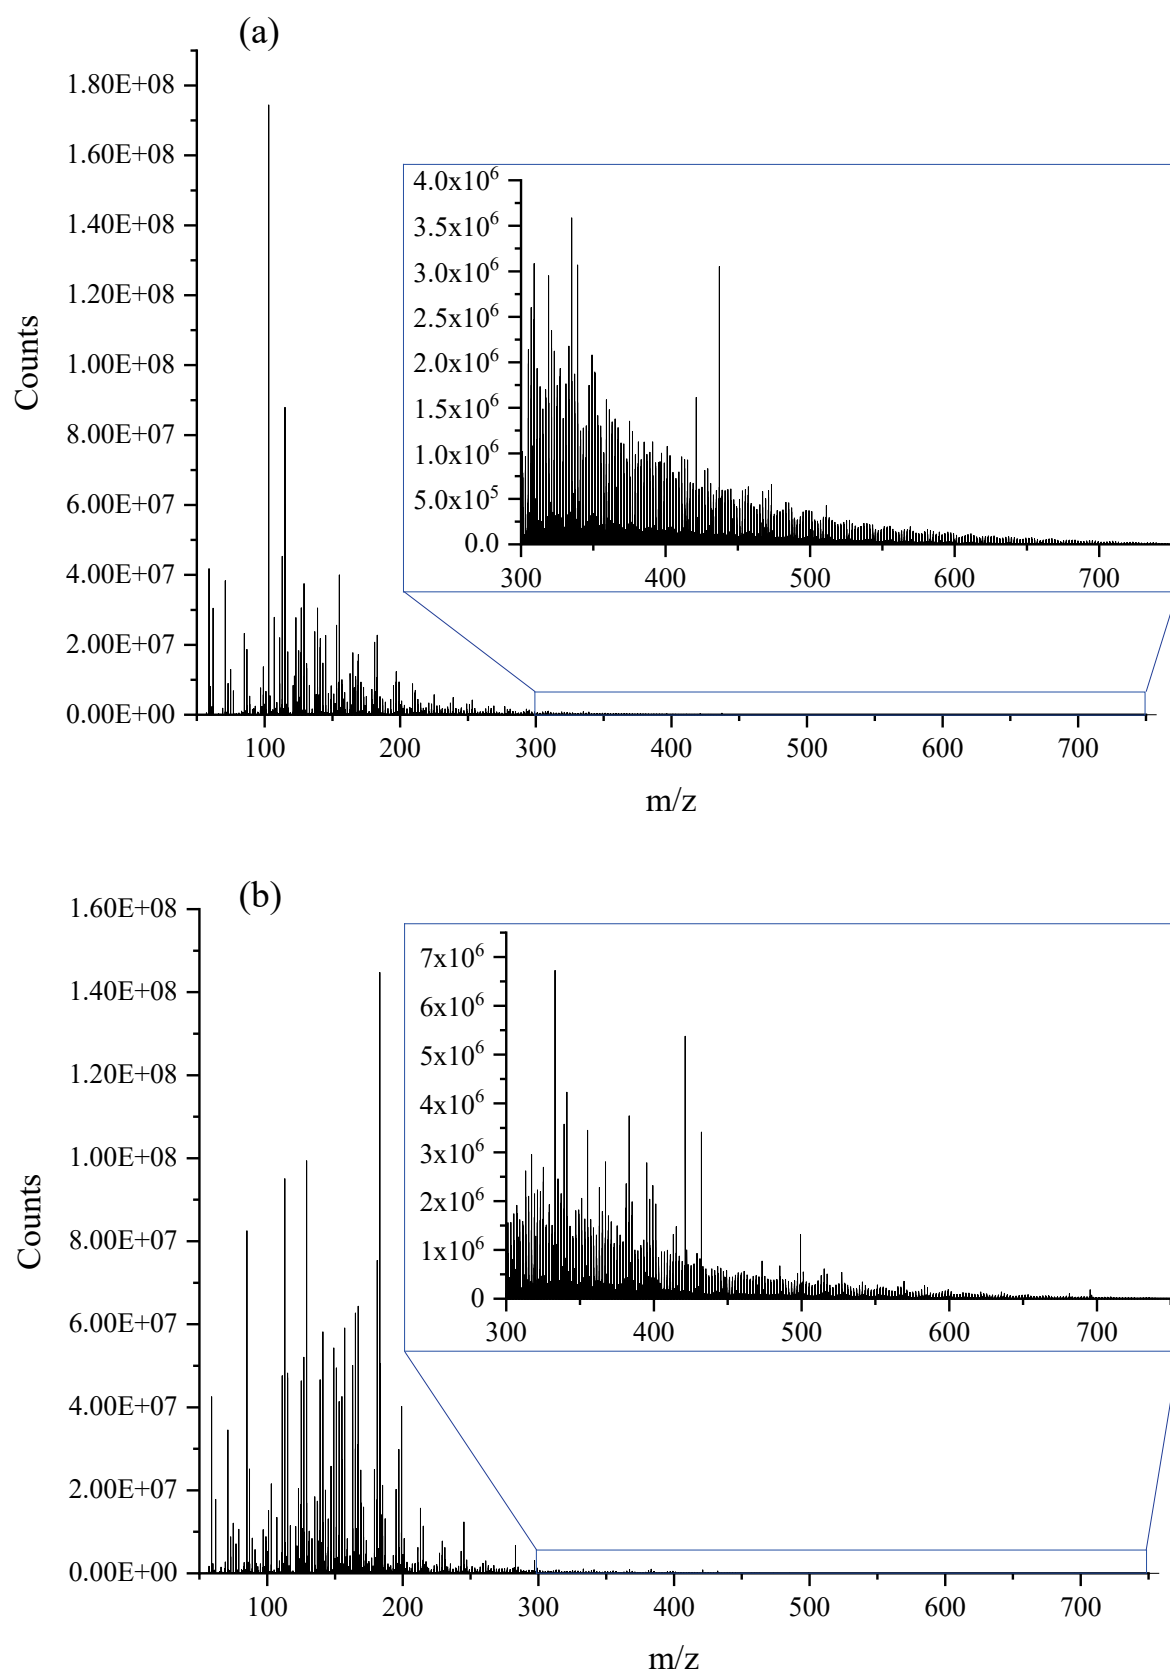

**Fig. S2:**  $\alpha$ -pinene and limonene mass Spectra acquired with a HESI source in negative mode

(a)

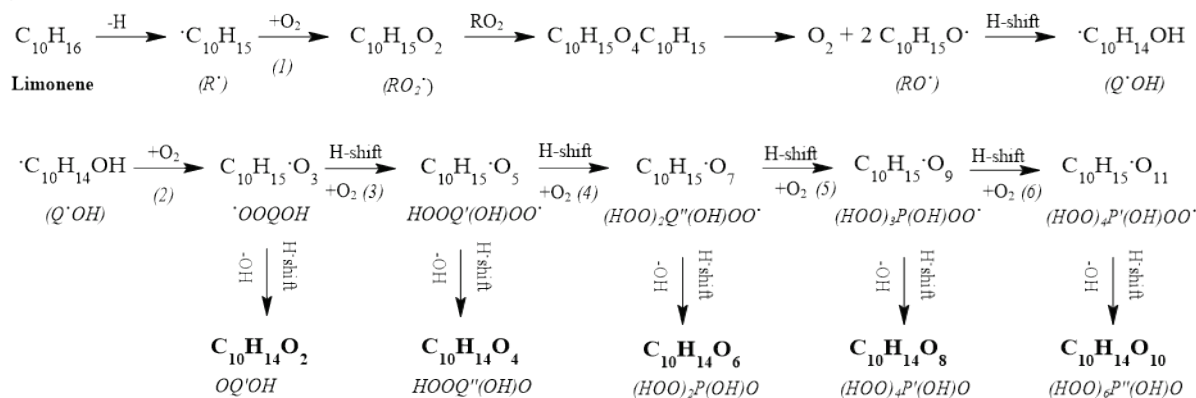

(b)

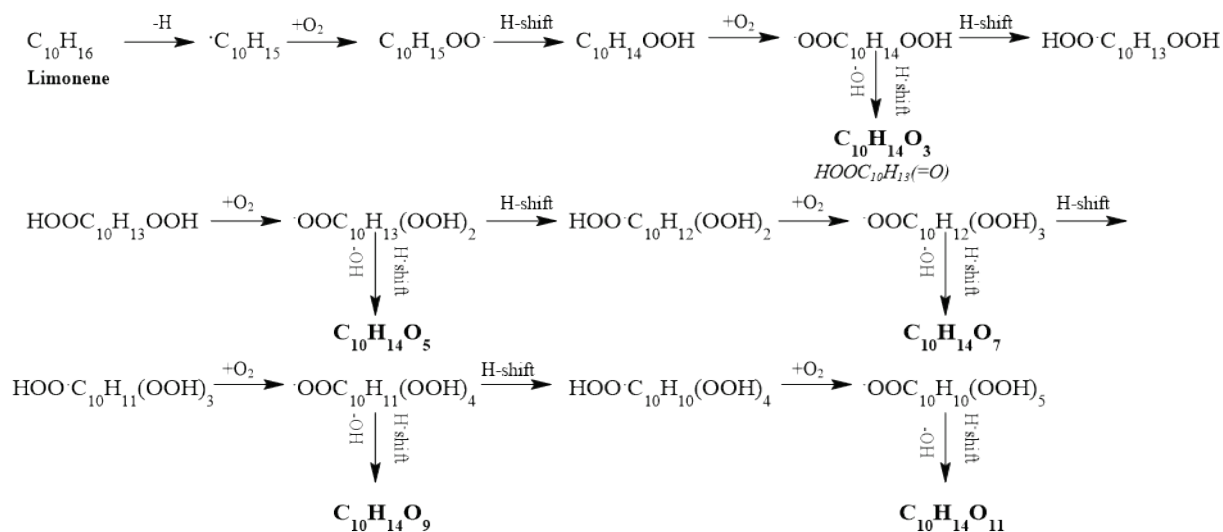

**Fig. S3:** Molecular forms resulting from an autoxidation mechanism of limonene: a) even number of oxygens b) odd number of oxygens.

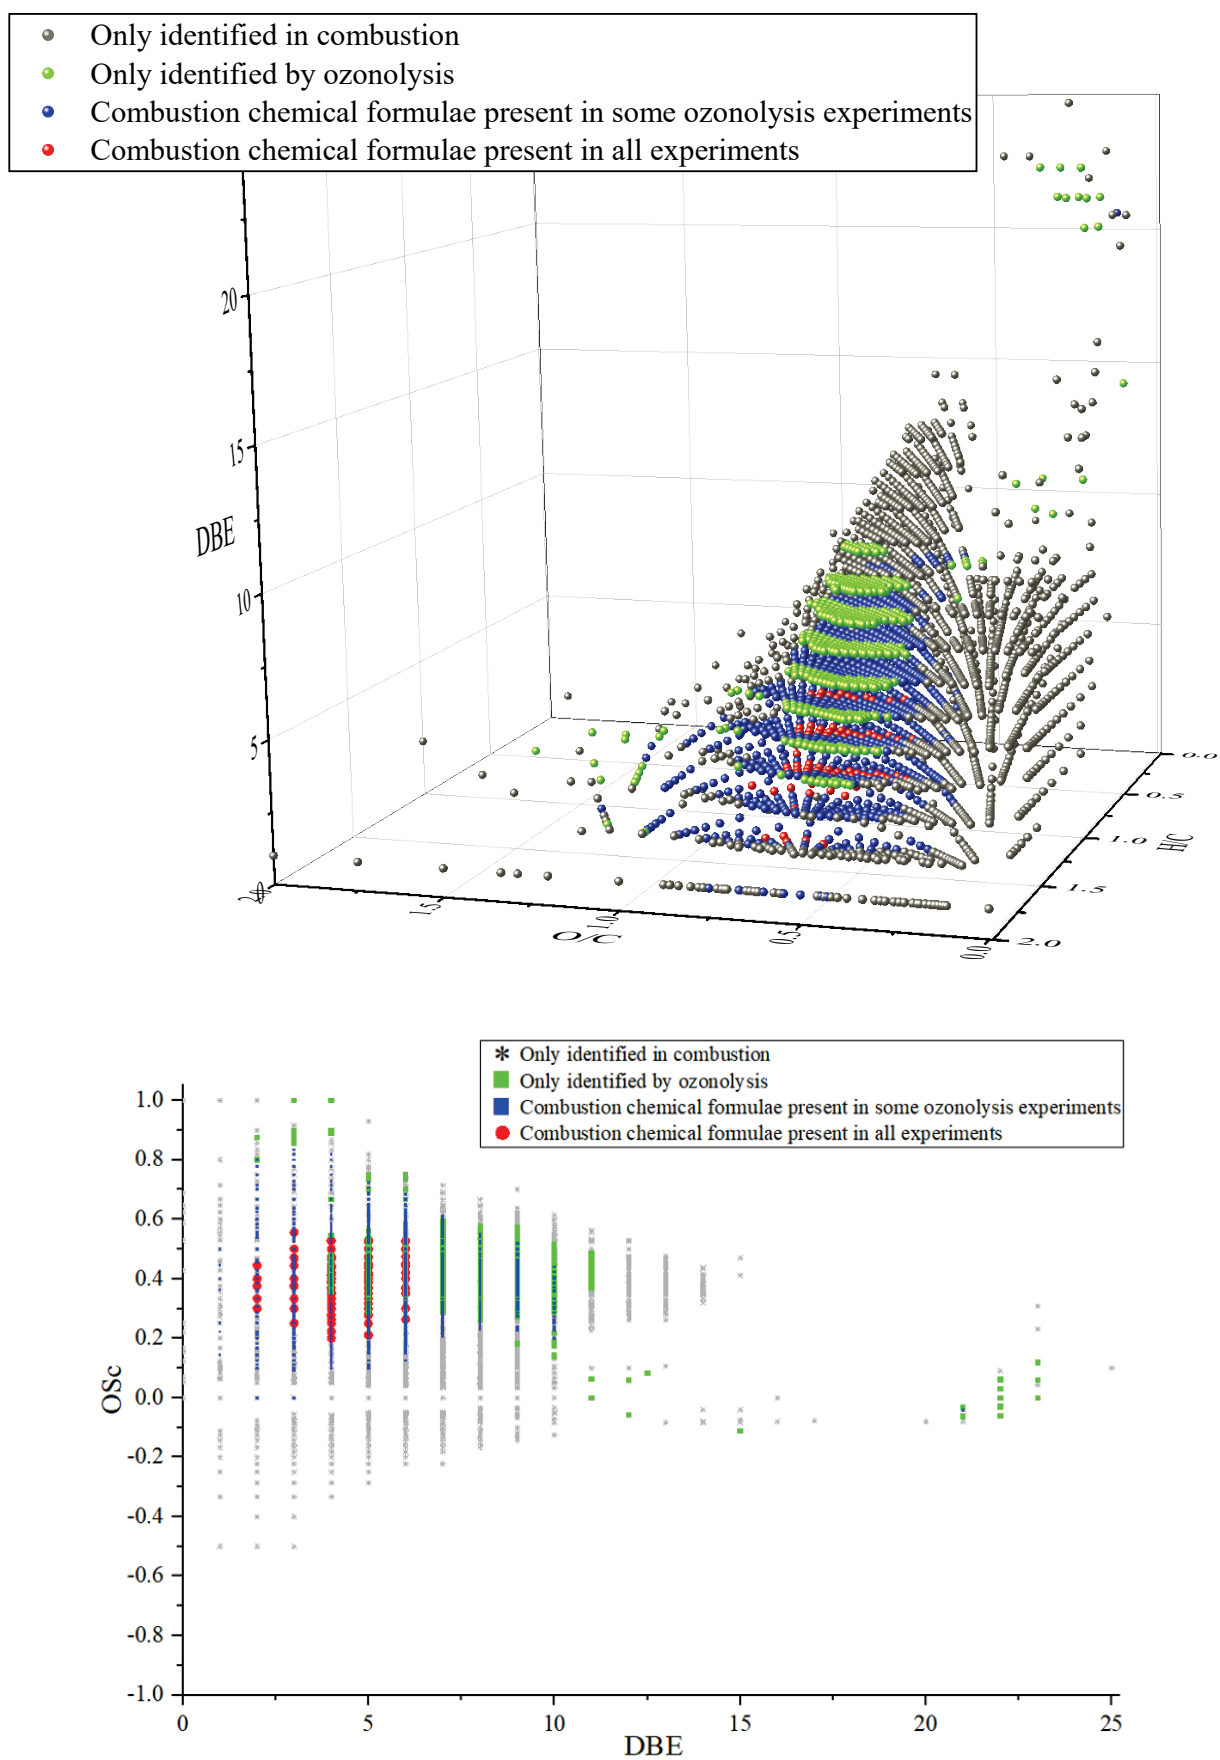

**Fig. S4:** a) 3-D representation of all limonene oxidation data where DBE is used as third dimension and b) Osc vs DBE graph

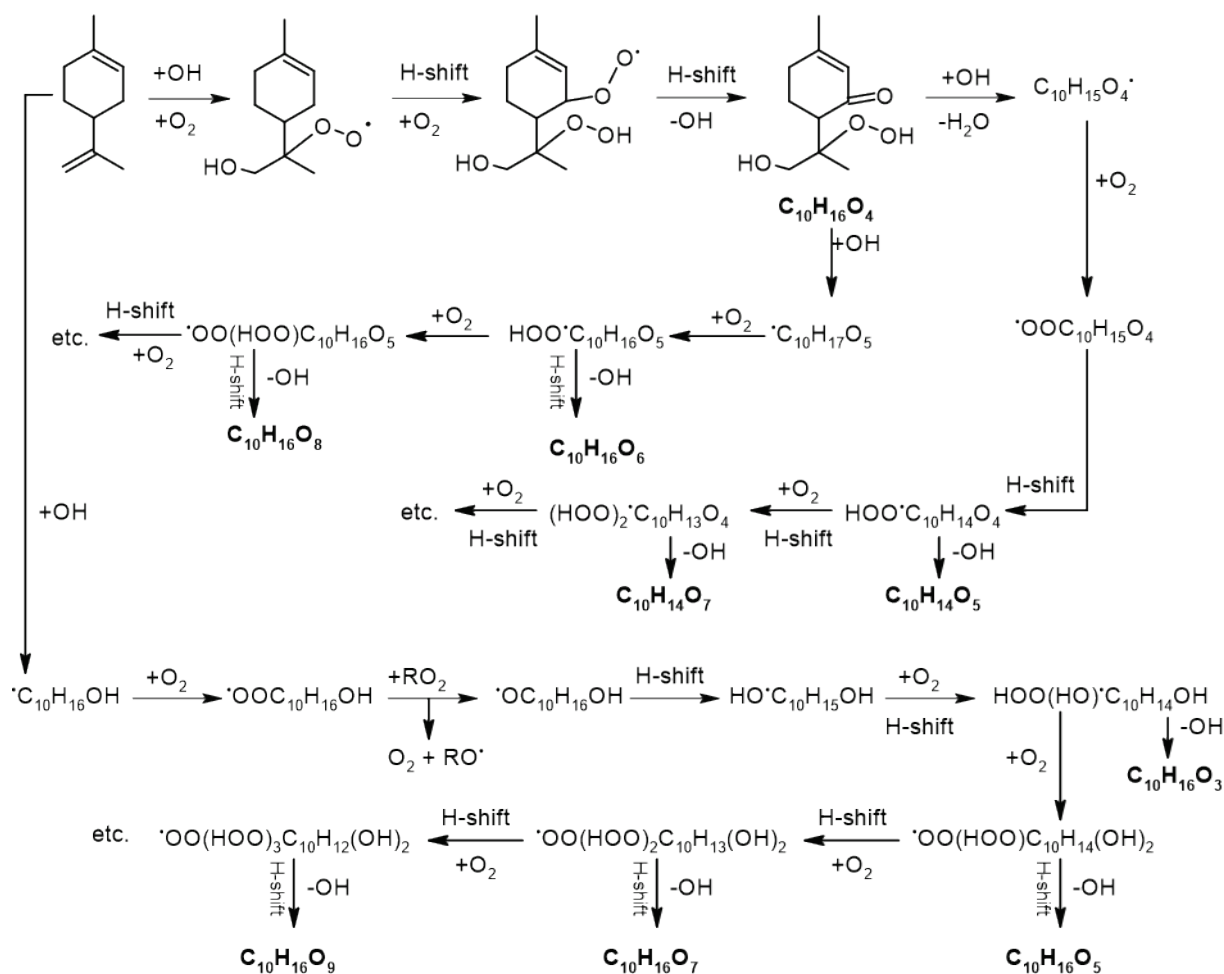

**Fig. S5:** Some proposed formation routes to  $C_{10}H_{16}O_x$  species via autoxidation

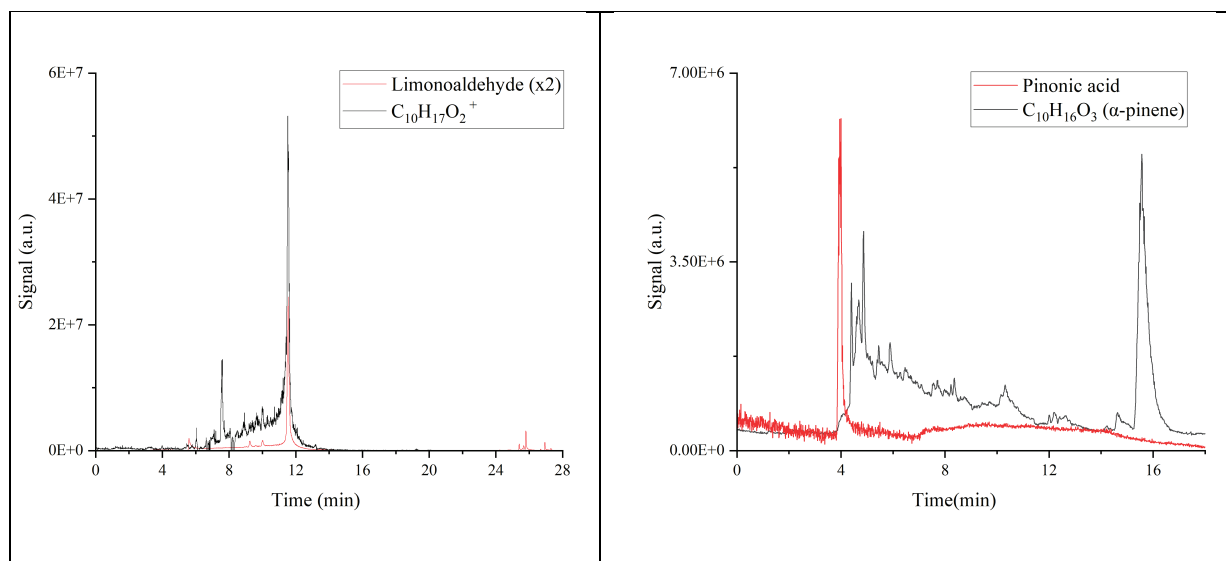

**Fig. S6:** Superposition of chromatographs (UHPLC) of limonoaldehyde (left) and pinonic acid (right) standards and  $C_{10}H_{16}O_2$  and  $C_{10}H_{16}O_3$  isomers (positive ionization mode).

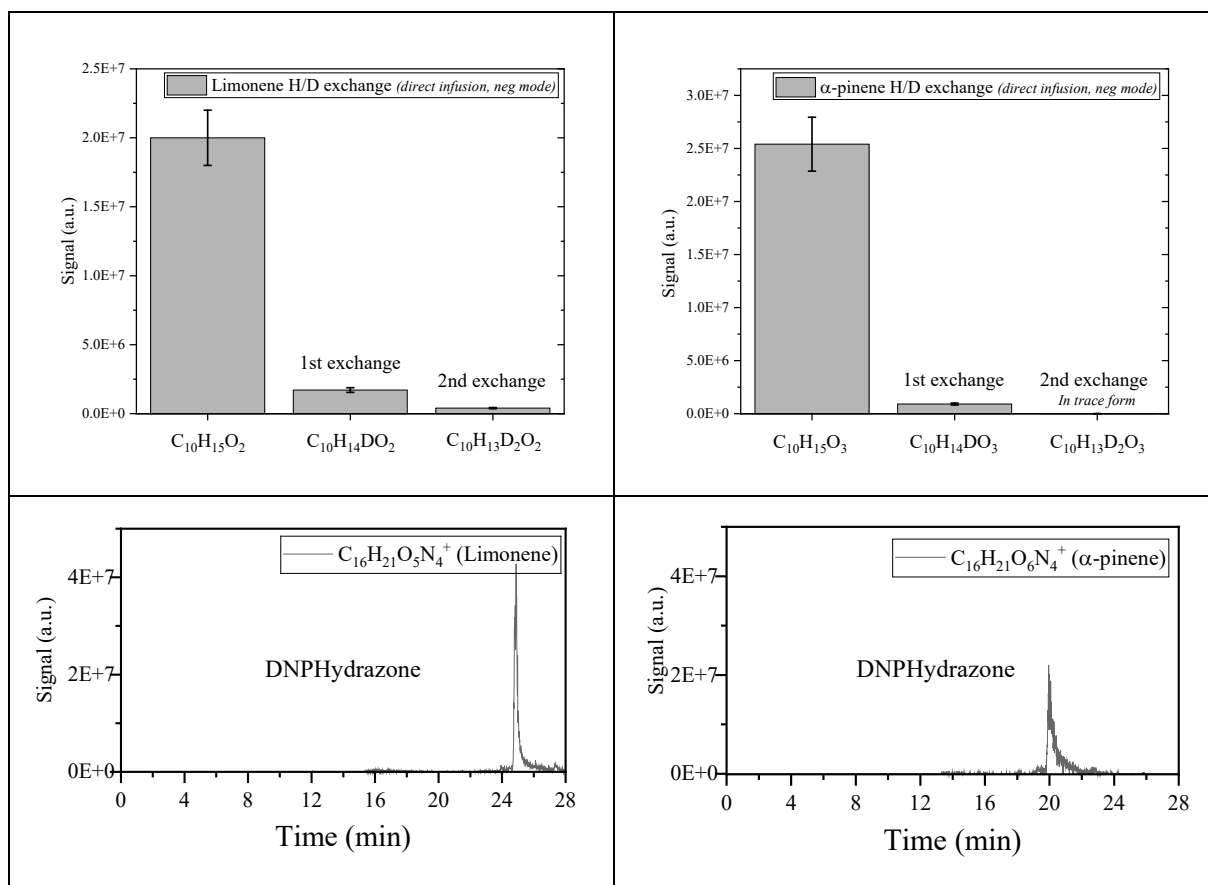

**Fig. S7:** D<sub>2</sub>O exchanges for limonene and  $\alpha$ -pinene (direct infusion, negative ionization mode) - top; and derivatization of carbonyls in limonene and  $\alpha$ -pinene oxidation samples using 2,4-DNPH (UHPLC, positive mode) – bottom.
